# Supplementary material
Source: PubMed Central journal article supplement (PMC4607112)
Supplement: JCI79322sd.pdf [file JCI79322sd.pdf]

## SUPPLEMENTAL METHODS

### **Sample collection and DNA extraction**

Pregnant Ashkenazi Jewish (AJ) couples, carrying mutation/s in the *GBA* gene, were recruited at the Shaare Zedek Medical Center (SZMC) Gaucher Clinic. Peripheral blood samples were collected from each couple, relevant mutation carrier family members, 8 unrelated AJ *GBA* N370S homozygotes, and 3 unrelated AJ *GBA* N370S heterozygote duos. Genomic DNA was then prepared from all samples using the FlexiGene DNA kit (QIAGEN) according to the manufacturer's protocol. For pregnant female indices, plasma was separated from peripheral blood by centrifugation at 1,900 x *g* for 10 minutes at 4°C. The plasma supernatant was then recentrifuged at 16,000 x *g* for 10 minutes at 4°C and 3ml of the resulting supernatant was used for cell-free DNA extraction with the QIAamp Circulating Nucleic Acid kit (QIAGEN) according to the manufacturer's protocol. The maternal plasma DNA extracts were then pre-amplified, in duplicate, with the SurePlex Amplification System (Illumina) ahead of downstream processing. All familial mutations in *GBA* were Sanger sequence verified prior to commencement of the study. Ethical approval for the study, including usage of materials from human subjects, was obtained from the local institutional review board and written informed consent was obtained from all study participants.

### **Next generation sequencing (NGS) of *GBA*-flanking single nucleotide polymorphisms (SNPs)**

Two TruSeq Custom Amplicon panels were designed with DesignStudio software (Illumina) to amplify and sequence *GBA*-flanking SNPs in all samples. The smaller panel sequenced 490 SNPs and the larger panel sequenced 5,000 SNPs. Indexed next generation sequencing libraries were prepared and normalized according to the manufacturer's protocol (Illumina) followed by 2x150bp pair-end sequencing on a MiSeq (small panel) or NextSeq 500 (large panel) instrument (Illumina) to a mean depth

of at least 500x or 3800x for genomic and plasma DNA samples, respectively. After sequencing runs, the data were aligned to target sequences on the human reference genome (hg19) using MiSeq Reporter software (Illumina) for the small panel or the TruSeq Amplicon v1.1 app on BaseSpace (<https://basespace.illumina.com/>) for the large panel. Genotyping data was extracted from each alignment using the SAMtools mpileup program to yield sample-specific SNP genotype profiles and then the SNPs were annotated by snpEff with dbSNP138 (small panel) or dbSNP141 (large panel). These profiles were then combined into single family-specific .csv files using in-house software so as to facilitate familial and fetal linkage analysis (see below). Prior to linkage analysis, non-GBA flanking SNP calls and SNP calls on heavily self-chained genomic segments were removed. Genomic DNA SNP genotype calls were categorized into one of 3 distinct classifications based on the percentage of non-reference genome allele (B allele) sequencing reads at each locus: homozygote reference allele (AA; 0%-20% B allele reads); homozygote non-reference allele (BB; 80%-100% B allele reads); or heterozygote (AB; 30%-70% B allele reads). Any loci that did not meet these classification criteria were excluded from further downstream analysis. As a rule, parental haplotypes were constructed with SNPs for which the parent was heterozygous and at least one of his/her first degree relatives was homozygous.

### **Construction of consensus AJ N370S and familial haplotypes**

The initial consensus AJ N370S GBA-flanking haplotype was constructed by performing homozygosity mapping with custom SNP small panel NGS datasets from 7 unrelated AJ N370S homozygotes (14 N370S chromosomes). Subsequently, 6 more AJ N370S haplotypes were derived from linkage analysis on SNP NGS datasets from 6 unrelated AJ N370S mutation carrier duos. Each linkage-based N370S haplotype was then crossed with the consensus sequence derived from homozygosity mapping to identify inconsistencies. These sequence discrepancies were then used to mark consensus AJ N370S founder haplotype cut-offs (based on 20 N370S chromosomes, altogether, after the completion of all data

intersections). The larger consensus AJ N370S GBA-flanking haplotype was constructed by performing homozygosity mapping with custom SNP large panel NGS datasets from 8 unrelated AJ N370S homozygotes (16 N370S chromosomes). Subsequently, 12 more AJ N370S haplotypes were derived from linkage analysis on SNP NGS datasets from 12 unrelated AJ N370S mutation carrier duos. The final consensus AJ N370S founder haplotype cut-offs (based on 28 N370S chromosomes, altogether, after the completion of all data intersections) were then set as described above regarding the initial consensus haplotype construct.

### **Identification of fetal alleles in maternal plasma DNA**

In order to construct credible small fetal haplotypes (composed of <5 SNPs) with the small SNP sequencing panel, plasma DNA samples were sequenced in duplicate at high depth (>3,000x mean coverage) so as to augment statistical confidence in each individual fetal SNP genotype call. In all, four different combinations of parental SNP genotypes were analyzed in plasma DNA: A) Error rate informative (father and mother [of the fetus] both homozygote "AA"); B) Dosage informative (father and mother homozygote for opposite alleles); C) Paternal haplotype informative (father heterozygote and mother homozygote); and D) Maternal haplotype informative SNPs (mother heterozygote and father homozygote). Error rate informative SNPs measured the sequencing error rate in plasma DNA samples by assessing the appearance of biologically impossible SNP reads. At >1000x read depth, error rates of 0.6% +/- 0.6% were measured in plasma DNA samples. Dosage informative SNPs (denoted heretofore as "SNP I") measured the paternal portion of fetal plasma DNA by determining the fraction of paternal alleles per maternal alleles. These SNPs also confirmed the presence of fetal DNA in maternal plasma. Paternal haplotype informative SNPs (denoted heretofore as "SNP II") feature a unique nucleotide in the fetus' father that is not present in the maternal genotype. When identified in maternal plasma DNA, the paternal unique allele is expected to comprise the same fraction as those of paternal alleles in dosage

informative SNPs. In general, the paternal haplotype of the fetus was deduced wherever the father's unique SNP II allele was identified in one of 2 plasma DNA replicates (at a SNP position with >1000x sequencing depth) with relatively high frequency (>2 $\sigma$  from the mean sequencing error rate as determined from error rate informative SNPs) in maternal plasma DNA. The computed sensitivity/specificity scores for this method are provided as a function of the number of unique paternal SNPs identified in the fetus (see Supplemental Table 1).

For plasma DNA samples with high fetal dosage (>30% paternal fetal fraction), the paternal haplotype in the fetus was also deduced from non-unique SNP II alleles (with >500x coverage) for which there were no discrepancies between replicate fetal haplotype calls. The computed sensitivity/specificity scores for this method are provided as a function of the number of non-unique paternal SNPs identified in the fetus (see Supplemental Table 2). Maternal haplotype informative SNPs (denoted heretofore as "SNP III") were used to determine the maternal haplotype in the fetus at >1000x sequencing coverage. These SNPs indicated a heterozygous fetal genotype when allele-allele ratios were balanced, and a homozygous fetal genotype when these ratios were imbalanced by a number >3 $\sigma$  from the mean sequencing error rate (as determined from error rate informative SNPs). Depending on the father's homozygous allele, the maternal fetal allele was deduced based on the presence or absence of skewing (<50% non-reference nucleotide skewed representation if the father was homozygote A [for the reference nucleotide]; >50% non-reference nucleotide skewed if the father was homozygote B [for the non-reference nucleotide]) in maternal heterozygous SNP III loci on both plasma DNA replicates. The computed sensitivity/specificity scores for this method are provided as a function of the number of maternal haplotyped SNPs identified in the fetus (see Supplemental Table 3). All parental SNP combinations that did not fall within the above guidelines were not utilized in this study.

In order to construct large fetal haplotypes (composed of >5 SNPs) with the large SNP sequencing panel, plasma DNA samples were analyzed as above with the following modifications. Error rate informative

SNPs indicated a 1% error rate at read depths exceeding 100x. Accordingly, paternal haplotype informative and maternal haplotype informative SNPs were assessed from a minimum read depth of 100 whereupon only skewing exceeding 1% B-allele frequency in plasma DNA with respect to maternal DNA (at a particular locus) was considered significant enough for incorporation into the fetal haplotype. This filter was applied so as to reduce genotyping errors emerging from either sequencing error and/or off-target sequence contamination.

Ultimately, fetal diagnosis was achieved after comparing the paternal and maternal cell-free fetal DNA (cffDNA) haplotypes with family-based and/or N370S consensus or near consensus haplotypes as relevant. Altogether, the entire noninvasive NGS-based prenatal test, from blood sample processing to fetal diagnosis, was completed in 5 work days. In addition, all diagnoses were confirmed by post-natal genetic testing. For family 1, allelic inheritance of the N370S mutation was further confirmed by postnatal linkage analysis with short tandem repeat (STR) markers.

**Supplemental Table 1.** Simulated sensitivity/specificity for unique paternal allele diagnosis

| No. SNPs in fetal haplotype | Sensitivity/Specificity <sup>A</sup> |
|-----------------------------|--------------------------------------|
| 1                           | 94.97%                               |
| 2                           | 99.72%                               |
| 3                           | 99.96%                               |
| 4                           | 99.97%                               |
| 5                           | 100.00%                              |
| 6                           | 100.00%                              |
| 7                           | 100.00%                              |
| 8                           | 100.00%                              |
| 9                           | 100.00%                              |
| 10                          | 100.00%                              |

A. The formula for these calculations was as follows:  $[1 - ((0.5)(er) + [(0.5)(er)]^n)]$  where "n" represents the number of SNPs in the fetal haplotype and "er" represents the chance (which is 5%) of unique paternal allele detection at  $2\sigma$  from the sequencing error rate as determined from error rate informative SNP sequences (see Supplemental Methods). For 1 to 4 SNP haplotypes, a 0.03% correction was applied to account for the sex-specific male recombination rate in the +/- 250kb genomic region surrounding *GBA* according to reference (20) but if longer haplotypes do not flank the mutation, this correction should continue to be applied.

**Supplemental Table 2.** Simulated sensitivity/specificity for non-unique paternal allele diagnosis

| No. SNPs in fetal haplotype | Sensitivity/Specificity <sup>A</sup> |
|-----------------------------|--------------------------------------|
| 1                           | 77.41%                               |
| 2                           | 94.88%                               |
| 3                           | 98.82%                               |
| 4                           | 99.71%                               |
| 5                           | 99.94%                               |
| 6                           | 99.99%                               |
| 7                           | 100.00%                              |
| 8                           | 100.00%                              |
| 9                           | 100.00%                              |
| 10                          | 100.00%                              |

A. The formula for these calculations was as follows:  $[1 - ((0.5)(1 - er))^2]^n$  where "n" represents the number of SNPs in the fetal haplotype and "er" represents the chance (which is 5%) of unique paternal allele detection at  $2\sigma$  from the sequencing error rate as determined from error rate informative SNP sequences (see Supplemental Methods). For 1 to 4 SNP haplotypes, a 0.03% correction was applied to account for the sex-specific male recombination rate in the +/- 250kb genomic region surrounding *GBA* according to reference (20) but if longer haplotypes do not flank the mutation, this correction should continue to be applied.

**Supplemental Table 3.** Simulated sensitivity/specificity for maternal allele diagnosis

| No. SNPs in fetal haplotype | Sensitivity/Specificity <sup>A</sup> |
|-----------------------------|--------------------------------------|
| 1                           | 74.93%                               |
| 2                           | 93.68%                               |
| 3                           | 98.37%                               |
| 4                           | 99.54%                               |
| 5                           | 99.90%                               |
| 6                           | 99.98%                               |
| 7                           | 99.99%                               |
| 8                           | 100.00%                              |
| 9                           | 100.00%                              |
| 10                          | 100.00%                              |

A. The formula for these calculations was as follows:  $[1 - (0.5)^2]^n$  where "n" represents the number of SNPs in the fetal haplotype. For 1 to 4 SNP haplotypes, a 0.07% correction was applied to account for the sex-specific female recombination rate in the +/- 250kb *GBA* region according to reference (20) but if longer haplotypes do not flank the mutation, this correction should continue to be applied.



**Supplemental Table 4.** Parental family-based haplotype information

| Family   | Paternal familial haplotype data |                                         |                                    |                                 | Maternal familial haplotype data |                                         |                                    |                                 |
|----------|----------------------------------|-----------------------------------------|------------------------------------|---------------------------------|----------------------------------|-----------------------------------------|------------------------------------|---------------------------------|
|          | Paternal genotype                | Paternal family member used for linkage | Genotype of paternal family member | No. of SNPs in linked haplotype | Maternal genotype                | Maternal family member used for linkage | Genotype of maternal family member | No. of SNPs in linked haplotype |
| <b>1</b> | N370S/WT                         | father                                  | N370S/WT                           | 3                               | N370S/WT                         | sister                                  | N370S/WT                           | 43                              |
| <b>2</b> | WT/WT                            | N/A                                     | N/A                                | N/A                             | N370S/WT                         | mother                                  | N370S/WT                           | 11                              |

Abbreviations: WT, wild type; N/A, not applicable

**Supplemental Table 5. Consensus Ashkenazi Jewish N370S founder haplotype**

| Ch | Position (hg19) | dbSNP ID                       | REF | ALT | consensus AJ N370S haplotype <sup>A</sup> |
|----|-----------------|--------------------------------|-----|-----|-------------------------------------------|
| 1  | 155186381       | rs148168407                    | G   | .   | A                                         |
| 1  | 155186551       | rs147791517                    | C   | .   | A                                         |
| 1  | 155186648       | rs372959451                    | T   | .   | A                                         |
| 1  | 155186669       | rs184043244                    | G   | .   | A                                         |
| 1  | 155186716       | rs375966138                    | A   | .   | A                                         |
| 1  | 155186729       | rs284455596                    | T   | .   | A                                         |
| 1  | 155186742       | rs1057941                      | G   | .   | A                                         |
| 1  | 155187761       | rs185115702                    | C   | .   | A                                         |
| 1  | 155187786       | rs149513274                    | G   | .   | A                                         |
| 1  | 155188130       | rs138784147                    | A   | .   | A                                         |
| 1  | 155188811       | rs115207152                    | A   | .   | A                                         |
| 1  | 155188856       | rs183891209                    | G   | .   | A                                         |
| 1  | 155194980       | rs2049805                      | T   | .   | A                                         |
| 1  | 155195044       | rs6677756                      | A   | G   | B                                         |
| 1  | 155197462       | rs2990245                      | C   | .   | A                                         |
| 1  | 155197553       | rs201008360                    | G   | .   | A                                         |
| 1  | 155197554       | rs3835732                      | T   | .   | A                                         |
| 1  | 155197556       | rs377586853                    | G   | .   | A                                         |
| 1  | 155199308       | rs181495640                    | G   | .   | A                                         |
| 1  | 155199315       | rs12407919                     | C   | .   | A                                         |
| 1  | 155199356       | rs186289485                    | G   | .   | A                                         |
| 1  | 155201235       | rs1045253                      | G   | .   | A                                         |
| 1  | 155204239       | <i>GBA</i> 3' UTR <sup>B</sup> | .   | .   | -                                         |
| 1  | 155214653       | <i>GBA</i> 5' UTR <sup>B</sup> | .   | .   | -                                         |
| 1  | 155216184       | rs1158151                      | T   | .   | A                                         |
| 1  | 155218365       | rs734073                       | T   | .   | A                                         |
| 1  | 155218370       | rs139803480                    | C   | .   | A                                         |
| 1  | 155218446       | rs734074                       | A   | .   | A                                         |
| 1  | 155218476       | rs192678801                    | C   | .   | A                                         |
| 1  | 155218487       | rs185728978                    | G   | .   | A                                         |
| 1  | 155221837       | rs2072647                      | C   | .   | A                                         |
| 1  | 155221844       | rs2075567                      | C   | .   | A                                         |
| 1  | 155221862       | rs2974918                      | C   | .   | A                                         |
| 1  | 155221890       | rs180894227                    | C   | .   | A                                         |
| 1  | 155221927       | rs186280028                    | C   | .   | A                                         |
| 1  | 155221942       | rs190742122                    | C   | .   | A                                         |
| 1  | 155224091       | rs2075566                      | C   | .   | A                                         |
| 1  | 155224123       | rs2974915                      | A   | .   | A                                         |
| 1  | 155224144       | rs200790772                    | C   | .   | A                                         |
| 1  | 155224154       | rs377616889                    | A   | .   | A                                         |
| 1  | 155224301       | rs2242577                      | C   | .   | A                                         |
| 1  | 155224393       | rs12758281                     | G   | .   | A                                         |
| 1  | 155224404       | rs368919969                    | G   | .   | A                                         |
| 1  | 155224417       | rs140665962                    | C   | .   | A                                         |

|   |           |             |   |   |   |
|---|-----------|-------------|---|---|---|
| 1 | 155230131 | rs1142287   | C | . | A |
| 1 | 155230134 | rs138266025 | C | . | A |
| 1 | 155230144 | rs143921371 | T | . | A |
| 1 | 155230157 | rs201400281 | G | . | A |
| 1 | 155230187 | rs371041272 | G | . | A |
| 1 | 155230212 | rs149415891 | C | . | A |
| 1 | 155230222 | rs373833483 | G | . | A |
| 1 | 155232071 | rs111246834 | C | . | A |
| 1 | 155232074 | rs1046188   | C | . | A |
| 1 | 155232093 | rs375274930 | G | . | A |
| 1 | 155232189 | rs368313864 | A | . | A |
| 1 | 155234821 | rs1076556   | A | . | A |
| 1 | 155234827 | rs199775545 | A | . | A |
| 1 | 155234895 | rs12044394  | T | . | A |
| 1 | 155234911 | rs12043655  | A | . | A |
| 1 | 155234914 | rs148772014 | G | . | A |
| 1 | 155235493 | rs1078699   | T | . | A |
| 1 | 155235535 | rs760078    | A | . | A |
| 1 | 155235557 | rs192046581 | C | . | A |
| 1 | 155239624 | rs2361543   | G | . | A |
| 1 | 155239657 | rs142820979 | C | . | A |
| 1 | 155241361 | rs2236863   | G | . | A |
| 1 | 155241368 | rs57336884  | A | . | A |
| 1 | 155241459 | rs140225864 | T | . | A |
| 1 | 155247707 | rs12749306  | G | . | A |
| 1 | 155247722 | rs189401977 | G | . | A |
| 1 | 155248575 | rs7549276   | G | . | A |
| 1 | 155248622 | rs145609188 | C | . | A |
| 1 | 155248655 | rs181989907 | C | . | A |
| 1 | 155252833 | rs12049375  | G | . | A |
| 1 | 155253583 | rs7520184   | G | . | A |
| 1 | 155255837 | rs11264352  | T | . | A |
| 1 | 155255851 | rs373919604 | A | . | A |
| 1 | 155255906 | rs11264353  | G | . | A |
| 1 | 155257492 | rs11264355  | C | . | A |
| 1 | 155257531 | rs202118354 | C | . | A |
| 1 | 155257557 | rs191318307 | C | . | A |
| 1 | 155257559 | rs373694526 | G | . | A |
| 1 | 155260096 | rs932972    | G | . | A |
| 1 | 155260153 | rs35957800  | G | . | A |
| 1 | 155260348 | rs374751259 | G | . | A |
| 1 | 155260349 | rs8177994   | G | . | A |
| 1 | 155260350 | rs1052177   | A | . | A |
| 1 | 155260360 | rs368150636 | G | . | A |
| 1 | 155260382 | rs61755431  | C | . | A |
| 1 | 155260383 | rs1052176   | G | . | A |
| 1 | 155260402 | rs140859641 | G | . | A |

|   |           |             |   |   |   |
|---|-----------|-------------|---|---|---|
| 1 | 155260415 | rs370938255 | C | . | A |
| 1 | 155260434 | rs370316462 | C | . | A |
| 1 | 155260443 | rs190966689 | C | . | A |
| 1 | 155260448 | rs375525211 | C | . | A |
| 1 | 155262603 | rs8177984   | T | . | A |
| 1 | 155262613 | rs4620533   | C | . | A |
| 1 | 155262638 | rs8177983   | T | . | A |
| 1 | 155269776 | rs3020781   | A | . | A |
| 1 | 155269780 | rs8177964   | G | . | A |
| 1 | 155269830 | rs8177963   | A | . | A |
| 1 | 155269863 | rs377494351 | G | . | A |
| 1 | 155269864 | rs369726754 | G | . | A |
| 1 | 155269865 | rs199627687 | C | . | A |
| 1 | 155273869 | rs4971072   | G | A | B |
| 1 | 155273917 | rs141353488 | C | . | A |
| 1 | 155274960 | rs12032720  | G | . | A |
| 1 | 155279482 | rs2297480   | T | . | A |
| 1 | 155279550 | rs144868148 | C | . | A |
| 1 | 155282829 | rs11264359  | A | . | A |
| 1 | 155282884 | rs34838448  | T | . | A |
| 1 | 155289545 | rs11264361  | T | . | A |
| 1 | 155318308 | rs11264363  | G | C | B |
| 1 | 155318313 | rs138544252 | T | . | A |
| 1 | 155318353 | rs368485885 | T | . | A |
| 1 | 155322142 | rs12239114  | G | . | A |
| 1 | 155322147 | rs148991117 | T | . | A |
| 1 | 155337338 | rs11264367  | T | . | A |
| 1 | 155337373 | rs34538089  | A | . | A |
| 1 | 155345043 | rs5005770   | A | . | A |
| 1 | 155345056 | rs374205358 | T | . | A |
| 1 | 155345077 | rs73008959  | G | . | A |
| 1 | 155359817 | rs72704164  | A | . | A |
| 1 | 155359820 | rs188552875 | A | . | A |
| 1 | 155359830 | rs11264369  | T | C | B |
| 1 | 155359880 | rs6694257   | C | . | A |
| 1 | 155359905 | rs374170158 | G | . | A |
| 1 | 155368203 | rs7556102   | C | A | B |
| 1 | 155368210 | rs56770523  | T | . | A |
| 1 | 155368233 | rs375072511 | G | . | A |
| 1 | 155368288 | rs73008989  | C | . | A |
| 1 | 155368294 | rs201573542 | T | . | A |
| 1 | 155368311 | rs183124840 | T | . | A |
| 1 | 155389688 | rs10908465  | C | . | A |
| 1 | 155407083 | rs146899245 | G | . | A |
| 1 | 155407096 | rs12041534  | C | . | A |
| 1 | 155407111 | rs114662639 | A | . | A |
| 1 | 155407180 | rs149436342 | A | . | A |

|   |           |             |   |   |   |
|---|-----------|-------------|---|---|---|
| 1 | 155412930 | rs11264372  | A | . | A |
| 1 | 155413304 | rs1325908   | C | A | B |
| 1 | 155413331 | rs151301522 | T | . | A |
| 1 | 155413360 | rs72993428  | C | . | A |
| 1 | 155413374 | rs376952825 | C | . | A |
| 1 | 155413386 | rs79999785  | T | . | A |
| 1 | 155414729 | rs10796943  | T | . | A |
| 1 | 155414768 | rs12730906  | C | . | A |
| 1 | 155414806 | rs375077645 | G | . | A |
| 1 | 155414813 | rs12034526  | T | . | A |
| 1 | 155424065 | rs11264375  | T | . | A |
| 1 | 155427062 | rs6684889   | T | A | B |
| 1 | 155427148 | rs1536255   | C | . | A |
| 1 | 155427688 | rs10796945  | G | . | A |
| 1 | 155433942 | rs12724079  | T | C | B |
| 1 | 155433971 | rs140724364 | G | . | A |
| 1 | 155434017 | rs114909331 | A | . | A |

Abbreviations: Ch, chromosome; REF, reference nucleotide (dbSNP Build 138); ALT, alternate (non-reference)

nucleotide (dbSNP Build 138)

- A. For the consensus AJ N370S haplotype: "A" = dbSNP reference nucleotide; "B" = dbSNP non-reference nucleotide
- B. The region shaded in gray indicates *GBA* gene 5' and 3' locus boundaries

**Supplemental Table 6.** Identification of the paternal allele in the family 1 fetus (small panel)

| Variant data |                    |                       |              |                  |                  | plasma DNA rep         |        | plasma DNA rep          |        | Haplotypes <sup>E</sup> |      |              | FAI <sup>F</sup> |       |
|--------------|--------------------|-----------------------|--------------|------------------|------------------|------------------------|--------|-------------------------|--------|-------------------------|------|--------------|------------------|-------|
| Ch           | Position<br>(hg19) | dbSNP ID <sup>A</sup> | DFM<br>(bps) | PGT <sup>B</sup> | MGT <sup>B</sup> | FL <sup>C</sup><br>(%) | 1-1    |                         | 1-2    |                         | PHiF | PFB<br>N370S | N370S<br>cons    | DPAiF |
|              |                    |                       |              |                  |                  |                        | RD (x) | BAF <sup>D</sup><br>(%) | RD (x) | BAF <sup>D</sup><br>(%) |      |              |                  |       |
| 1            | 155007293          | rs4845404             | 198,341      | AB               | BB               |                        | 7748   | <b>64.4</b>             | 7692   | 98.6                    | A    | -            | -                | -     |
| 1            | 155007302          | rs4845405             | 198,332      | AB               | BB               |                        | 7976   | <b>66.4</b>             | 8000   | 99.7                    | A    | -            | -                | -     |
| 1            | 155009258          | rs11264298            | 196,376      | AB               | BB               |                        | 1      | 0.0                     | 1812   | <b>67.7</b>             | A    | -            | -                | -     |
| 1            | 155028522          | rs11264302            | 177,112      | AB               | AA               | 67.7                   | 698    | <b>0.3</b>              | 545    | <b>0.2</b>              | A    | B            | -                | WT    |
| 1            | 155030557          | rs11264303            | 175,077      | AB               | AA               |                        | 7999   | <b>0.9</b>              | 7999   | <b>0.8</b>              | A    | B            | -                | WT    |
| 1            | 155205634          | <b>N370S</b>          | -            | -                | -                |                        | -      | -                       | -      | -                       | -    | -            | -                | -     |

Abbreviations: Ch, chromosome; DFM, distance from mutation; PGT, paternal genotype; MGT, maternal genotype; FL, fetal load; rep, replicate plasma DNA sample, RD, sequencing read depth; BAF, B-allele frequency; PHiF, paternal haplotype in fetus; PFB N370S, paternal family-based N370S-linked haplotype; FAI, fetal allele identity; DPAiF, diagnosed paternal allele in fetus.

A. dbSNP ID or *GBA* mutation (red lettering)

B. For parental genotypes "AA" = homozygote dbSNP reference allele; "BB" = homozygote dbSNP non-reference allele; "AB" = heterozygote

C. Fetal load is 2x(mean paternal fetal fraction) as determined from SNP I and/or SNP II data (see Supplemental Methods)

D. B-allele frequency (BAF) is the % frequency of (B-allele reads)/(total read depth (RD)) at the indicated nucleotide position; bold BAF data was used to construct "PHiF"

- E. The paternal fetal haplotype (PHiF) was determined from SNP II data (as described in Supplemental Methods); the paternal N370S-linked haplotype (PFB N370S) was determined from family-based linkage analysis; the N370S consensus haplotype (N370S cons) was derived according to Figure 2. An "-" indicates that no haplotype data was available at the given position. Bold alleles were used for diagnosis of the paternal allele in the fetus ("DPAiF").
- F. Fetal allele identity (FAI) was determined by comparing the "PHiF" haplotype to the "PFB N370S" haplotype

**Supplemental Table 7.** Preliminary summary of noninvasive prenatal diagnosis with validation

| plasma DNA sample information |                |                   |                   |                | Paternal haplotype in fetus |                            |                     | Maternal haplotype in fetus |                     |            | Validation           |
|-------------------------------|----------------|-------------------|-------------------|----------------|-----------------------------|----------------------------|---------------------|-----------------------------|---------------------|------------|----------------------|
| Family                        | Week gestation | Paternal genotype | Maternal genotype | Fetal load (%) | Diagnosis                   | Based on                   | Based on            | Based on                    | Based on            | Validation |                      |
|                               |                |                   |                   |                |                             | consensus N370S haplotype? | familial haplotype? | consensus N370S haplotype?  | familial haplotype? |            |                      |
| 1                             | 31             | N370S/WT          | N370S/WT          | 67.7           | WT                          | NO <sup>A</sup>            | YES                 | N370S                       | YES                 | YES        | Postnatal            |
| 2                             | 22             | WT/WT             | N370S/WT          | 5.7            | N/A                         | N/A                        | N/A                 | N370S                       | YES                 | NO         | Postnatal cord blood |

Abbreviation: N/A, not applicable

A. Due to paternal homozygosity in consensus N370S haplotype region



**Supplemental Table 8.** Identification of the maternal allele in the family 1 fetus (small panel)

| Variant data |                    |                       |              |                  |                  | plasma DNA rep         |        | plasma DNA rep          |        | Haplotypes <sup>E</sup> |      |       | FAI <sup>F</sup> |              |
|--------------|--------------------|-----------------------|--------------|------------------|------------------|------------------------|--------|-------------------------|--------|-------------------------|------|-------|------------------|--------------|
| Ch           | Position<br>(hg19) | dbSNP ID <sup>A</sup> | DFM<br>(bps) | PGT <sup>B</sup> | MGT <sup>B</sup> | FL <sup>C</sup><br>(%) | 1-1    |                         | 1-2    |                         | MHIF | MFB   | N370S            | DMAiF        |
|              |                    |                       |              |                  |                  |                        | RD (x) | BAF <sup>D</sup><br>(%) | RD (x) | BAF <sup>D</sup><br>(%) |      | N370S | cons             |              |
| 1            | 155047379          | rs1001848             | 158,255      | AA               | AB               |                        | 7876   | 13.1                    | 3565   | 8.6                     | A    | -     | -                | -            |
| 1            | 155068748          | rs7365544             | 136,886      | AA               | AB               |                        | 1604   | 30.9                    | 1260   | 32.6                    | A    | -     | -                | -            |
| 1            | 155079477          | rs7367207             | 126,157      | AA               | AB               |                        | 3082   | 44.4                    | 4681   | 42.1                    | A    | -     | -                | -            |
| 1            | 155140648          | rs11264339            | 64,986       | AA               | AB               |                        | 7997   | 8.8                     | 7974   | 28.8                    | A    | -     | -                | -            |
| 1            | 155205634          | <b>N370S</b>          | -            | -                | -                |                        | -      | -                       | -      | -                       | -    | -     | -                | -            |
| 1            | 155218446          | rs734074              | -12,812      | AA               | AB               |                        | 1132   | 0.7                     | 7961   | 0.5                     | A    | A     | A                | <b>N370S</b> |
| 1            | 155224091          | rs2075566             | -18,457      | AA               | AB               | 67.7                   | 7911   | 11.2                    | 2115   | 34.8                    | A    | A     | A                | <b>N370S</b> |
| 1            | 155230131          | rs1142287             | -24,497      | AA               | AB               |                        | 7804   | 41.4                    | 7685   | 17.9                    | A    | A     | A                | <b>N370S</b> |
| 1            | 155273869          | rs4971072             | -68,235      | BB               | AB               |                        | 5957   | 70.3                    | 5353   | 55.6                    | B    | B     | B                | <b>N370S</b> |
| 1            | 155274960          | rs12032720            | -69,326      | AA               | AB               |                        | 5848   | 1.8                     | 7986   | 9.8                     | A    | A     | A                | <b>N370S</b> |
| 1            | 155282829          | rs11264359            | -77,195      | AA               | AB               |                        | 7938   | 24.4                    | 4796   | 1.6                     | A    | A     | A                | <b>N370S</b> |
| 1            | 155289545          | rs11264361            | -83,911      | AA               | AB               |                        | 1602   | 31.8                    | 1852   | 34.7                    | A    | A     | A                | <b>N370S</b> |
| 1            | 155318308          | rs11264363            | -112,674     | BB               | AB               |                        | 1433   | 81.7                    | 1862   | 62.3                    | B    | B     | B                | <b>N370S</b> |

1 155322142 rs12239114 -116,508 **AA** **AB** 7944 0.9 3198 44.8 **A** **A** **A** **N370S**

Abbreviations: MHiF, maternal haplotype in fetus; MFB N370S, maternal family-based N370S-linked haplotype; N370S cons, consensus N370S haplotype, FAI, fetal allele identity;

DMAiF, diagnosed maternal allele in fetus; other abbreviations are the same as in Supplemental Table 6.

- A. dbSNP ID or *GBA* mutation (red lettering)
- B. For parental genotypes "AA" = homozygote dbSNP reference allele; "BB" = homozygote dbSNP non-reference allele; "AB" = heterozygote
- C. Fetal load is  $2 \times (\text{mean paternal fetal fraction})$  as determined from SNP I and/or SNP II data (see Supplemental Methods)
- D. B-allele frequency is the % frequency of (B-allele reads)/(total read depth (RD)) at the indicated nucleotide position
- E. The maternal fetal haplotype (MHiF) was determined from SNP III data (as described in Supplemental Methods); the maternal N370S-linked haplotype (MFB N370S) was determined from family-based linkage analysis; the N370S consensus haplotype (N370S cons) was derived according to Figure 2. An "-" indicates that no haplotype data was available at the given position. Bold alleles were used for diagnosis of the maternal allele in the fetus ("DMAiF").
- F. Fetal allele identity (FAI) was determined by comparing the "MHiF" haplotype to either the "MFB N370S" and/or "N370S cons" haplotypes

**Supplemental Table 9.** Identification of the maternal allele in the family 2 fetus (small panel)

| Variant data |                    |                       |              |                  |                  | plasma DNA rep         | plasma DNA rep | Haplotypes <sup>E</sup> |        |                         | FAI <sup>F</sup> |              |               |              |
|--------------|--------------------|-----------------------|--------------|------------------|------------------|------------------------|----------------|-------------------------|--------|-------------------------|------------------|--------------|---------------|--------------|
|              |                    |                       |              |                  |                  | 2-1                    | 2-2            |                         |        |                         |                  |              |               |              |
| Ch           | Position<br>(hg19) | dbSNP ID <sup>A</sup> | DFM<br>(bps) | PGT <sup>B</sup> | MGT <sup>B</sup> | FL <sup>C</sup><br>(%) | RD (x)         | BAF <sup>D</sup><br>(%) | RD (x) | BAF <sup>D</sup><br>(%) | MHiF             | MFB<br>N370S | N370S<br>cons | DMAiF        |
|              |                    |                       |              |                  |                  |                        |                |                         |        |                         |                  |              |               |              |
| 1            | 155205634          | <b>N370S</b>          | -            | -                | -                |                        | -              | -                       | -      | -                       | -                | -            | -             | -            |
| 1            | 155273869          | rs4971072             | -68,235      | <b>BB</b>        | <b>AB</b>        | 5.7                    | 7915           | 86.2                    | 2705   | 63.4                    | <b>B</b>         | <b>B</b>     | <b>B</b>      | <b>N370S</b> |
| 1            | 155282829          | rs11264359            | -77,195      | <b>AA</b>        | <b>AB</b>        |                        | 7913           | 34.5                    | 7929   | 30.1                    | <b>A</b>         |              | <b>A</b>      | <b>N370S</b> |
| 1            | 155424065          | rs11264375            | -218,431     | <b>AA</b>        | <b>AB</b>        |                        | 7945           | 27.3                    | 6552   | 30.6                    | <b>A</b>         |              | <b>A</b>      | <b>N370S</b> |

Abbreviations and footnotes are the same as in Supplemental Table 8.

**Supplemental Table 10.** Consensus Ashkenazi Jewish N370S founder haplotype

| Ch | Position<br>(hg19) | dbSNP ID    | REF | ALT | consensus AJ N370S haplotype <sup>A</sup> |
|----|--------------------|-------------|-----|-----|-------------------------------------------|
| 1  | 155,175,894        | rs143461137 | G   | .   | A                                         |
| 1  | 155,175,959        | rs148003817 | C   | .   | A                                         |
| 1  | 155,181,843        | rs2974935   | G   | .   | A                                         |
| 1  | 155,181,880        | rs183507509 | G   | .   | A                                         |
| 1  | 155,181,881        | rs189399294 | C   | .   | A                                         |
| 1  | 155,181,895        | rs376771258 | C   | .   | A                                         |
| 1  | 155,181,921        | rs201017167 | T   | .   | A                                         |
| 1  | 155,181,922        | rs371111724 | A   | .   | A                                         |
| 1  | 155,182,164        | rs2075570   | C   | .   | A                                         |
| 1  | 155,182,166        | rs368470688 | C   | .   | A                                         |
| 1  | 155,182,174        | rs111443374 | A   | .   | A                                         |
| 1  | 155,182,198        | rs147593131 | C   | .   | A                                         |
| 1  | 155,182,202        | rs181961651 | G   | .   | A                                         |
| 1  | 155,182,208        | rs148055827 | C   | .   | A                                         |
| 1  | 155,182,209        | rs375049335 | G   | .   | A                                         |
| 1  | 155,182,215        | rs369259801 | G   | .   | A                                         |
| 1  | 155,182,221        | rs372693149 | C   | .   | A                                         |
| 1  | 155,182,226        | rs201939197 | G   | .   | A                                         |
| 1  | 155,184,975        | rs140081212 | A   | .   | A                                         |
| 1  | 155,184,987        | rs147747731 | G   | .   | A                                         |
| 1  | 155,185,002        | rs190092871 | C   | .   | A                                         |
| 1  | 155,185,027        | rs374532694 | G   | .   | A                                         |
| 1  | 155,185,244        | rs186678403 | G   | .   | A                                         |
| 1  | 155,186,503        | rs3125563   | A   | .   | A                                         |
| 1  | 155,186,551        | rs147791517 | C   | .   | A                                         |
| 1  | 155,186,729        | rs28445596  | T   | .   | A                                         |
| 1  | 155,186,742        | rs1057941   | G   | .   | A                                         |
| 1  | 155,194,975        | rs374166175 | C   | .   | A                                         |
| 1  | 155,194,976        | rs190676369 | C   | .   | A                                         |
| 1  | 155,194,980        | rs2049805   | T   | .   | A                                         |
| 1  | 155,195,044        | rs6677756   | A   | G   | B                                         |
| 1  | 155,197,316        | rs189462506 | G   | .   | A                                         |
| 1  | 155,197,602        | rs2990246   | G   | .   | A                                         |
| 1  | 155,202,689        | rs10796940  | A   | .   | A                                         |
| 1  | 155,202,740        | rs150410131 | C   | .   | A                                         |
| 1  | 155,203,060        | rs56310840  | G   | .   | A                                         |
| 1  | 155,203,071        | rs377284382 | T   | .   | A                                         |
| 1  | 155,203,072        | rs188784797 | G   | .   | A                                         |
| 1  | 155,203,105        | rs369352114 | C   | .   | A                                         |
| 1  | 155,206,341        | rs9628662   | T   | .   | A                                         |
| 1  | 155,206,363        | rs373282418 | C   | .   | A                                         |
| 1  | 155,206,440        | rs368332143 | G   | .   | A                                         |
| 1  | 155,208,019        | rs61748906  | A   | .   | A                                         |

|   |             |             |   |   |   |
|---|-------------|-------------|---|---|---|
| 1 | 155,208,023 | rs76727497  | G | . | A |
| 1 | 155,208,024 | rs80205046  | G | . | A |
| 1 | 155,208,035 | rs76717906  | G | . | A |
| 1 | 155,208,047 | rs78659905  | G | . | A |
| 1 | 155,208,049 | rs374591570 | G | . | A |
| 1 | 155,208,052 | rs398123533 | A | . | A |
| 1 | 155,208,055 | rs188760929 | C | . | A |
| 1 | 155,208,056 | rs201615998 | G | . | A |
| 1 | 155,208,061 | rs398123532 | G | . | A |
| 1 | 155,208,081 | rs398123531 | C | . | A |
| 1 | 155,208,084 | rs76500263  | T | . | A |
| 1 | 155,208,087 | rs77933015  | A | . | A |
| 1 | 155,208,092 | rs77916306  | G | . | A |
| 1 | 155,208,093 | rs80222298  | G | . | A |
| 1 | 155,213,124 | rs11264345  | T | . | A |
| 1 | 155,217,435 | rs386635682 | A | . | A |
| 1 | 155,217,436 | rs76718527  | G | . | A |
| 1 | 155,217,437 | rs116352080 | G | . | A |
| 1 | 155,217,438 | rs199735676 | A | . | A |
| 1 | 155,217,473 | rs139111003 | T | . | A |
| 1 | 155,218,168 | rs2075568   | T | . | A |
| 1 | 155,218,210 | rs377201789 | G | . | A |
| 1 | 155,218,222 | rs187706644 | G | . | A |
| 1 | 155,218,230 | rs140120577 | C | . | A |
| 1 | 155,218,365 | rs734073    | T | . | A |
| 1 | 155,218,370 | rs139803480 | C | . | A |
| 1 | 155,218,446 | rs734074    | A | . | A |
| 1 | 155,218,476 | rs192678801 | C | . | A |
| 1 | 155,221,837 | rs2072647   | C | . | A |
| 1 | 155,221,890 | rs180894227 | C | . | A |
| 1 | 155,221,927 | rs186280028 | C | . | A |
| 1 | 155,224,091 | rs2075566   | C | . | A |
| 1 | 155,224,144 | rs200790772 | C | . | A |
| 1 | 155,224,154 | rs377616889 | A | . | A |
| 1 | 155,230,131 | rs386580544 | C | . | A |
| 1 | 155,230,134 | rs138266025 | C | . | A |
| 1 | 155,230,144 | rs143921371 | T | . | A |
| 1 | 155,230,157 | rs201400281 | G | . | A |
| 1 | 155,230,187 | rs371041272 | G | . | A |
| 1 | 155,230,212 | rs149415891 | C | . | A |
| 1 | 155,230,222 | rs373833483 | G | . | A |
| 1 | 155,231,626 | rs79051383  | C | . | A |
| 1 | 155,231,634 | rs190472110 | C | . | A |
| 1 | 155,231,646 | rs373599957 | A | . | A |
| 1 | 155,231,647 | rs376455114 | G | . | A |
| 1 | 155,232,867 | rs41264935  | A | . | A |
| 1 | 155,234,821 | rs1076556   | A | . | A |
| 1 | 155,234,827 | rs199775545 | A | . | A |
| 1 | 155,234,895 | rs12044394  | T | . | A |

|   |             |             |   |   |   |
|---|-------------|-------------|---|---|---|
| 1 | 155,234,911 | rs12043655  | A | . | A |
| 1 | 155,234,914 | rs148772014 | G | . | A |
| 1 | 155,235,493 | rs386515223 | T | . | A |
| 1 | 155,235,557 | rs192046581 | C | . | A |
| 1 | 155,239,624 | rs2361543   | G | . | A |
| 1 | 155,239,657 | rs142820979 | C | . | A |
| 1 | 155,239,733 | rs114256419 | T | . | A |
| 1 | 155,240,371 | rs34467038  | A | . | A |
| 1 | 155,240,372 | rs72461703  | A | . | A |
| 1 | 155,240,383 | rs115310831 | C | . | A |
| 1 | 155,240,465 | rs386596198 | T | . | A |
| 1 | 155,241,361 | rs2236863   | G | . | A |
| 1 | 155,241,368 | rs57336884  | A | . | A |
| 1 | 155,247,703 | rs375207474 | C | . | A |
| 1 | 155,247,707 | rs12749306  | G | . | A |
| 1 | 155,247,722 | rs189401977 | G | . | A |
| 1 | 155,248,575 | rs7549276   | G | . | A |
| 1 | 155,248,622 | rs145609188 | C | . | A |
| 1 | 155,248,655 | rs181989907 | C | . | A |
| 1 | 155,252,833 | rs12049375  | G | . | A |
| 1 | 155,257,492 | rs11264355  | C | . | A |
| 1 | 155,257,531 | rs202118354 | C | . | A |
| 1 | 155,257,557 | rs191318307 | C | . | A |
| 1 | 155,257,559 | rs373694526 | G | . | A |
| 1 | 155,258,752 | rs3814319   | G | . | A |
| 1 | 155,258,756 | rs3814318   | C | . | A |
| 1 | 155,258,759 | rs193130368 | G | . | A |
| 1 | 155,258,852 | rs8177998   | C | . | A |
| 1 | 155,260,096 | rs932972    | G | . | A |
| 1 | 155,260,348 | rs374751259 | G | . | A |
| 1 | 155,260,350 | rs1052177   | A | . | A |
| 1 | 155,260,360 | rs368150636 | G | . | A |
| 1 | 155,260,382 | rs61755431  | C | . | A |
| 1 | 155,260,383 | rs1052176   | G | . | A |
| 1 | 155,260,402 | rs140859641 | G | . | A |
| 1 | 155,260,415 | rs370938255 | C | . | A |
| 1 | 155,260,434 | rs370316462 | C | . | A |
| 1 | 155,260,443 | rs190966689 | C | . | A |
| 1 | 155,260,448 | rs375525211 | C | . | A |
| 1 | 155,279,550 | rs144868148 | C | . | A |
| 1 | 155,282,829 | rs11264359  | A | . | A |
| 1 | 155,282,884 | rs34838448  | T | . | A |
| 1 | 155,289,545 | rs11264361  | T | . | A |
| 1 | 155,289,607 | rs201526312 | G | . | A |
| 1 | 155,289,616 | rs201016550 | G | . | A |
| 1 | 155,289,623 | rs371872906 | C | . | A |
| 1 | 155,289,626 | rs146928362 | C | . | A |
| 1 | 155,318,308 | rs11264363  | G | C | B |
| 1 | 155,318,313 | rs138544252 | T | . | A |

|   |             |             |   |   |   |
|---|-------------|-------------|---|---|---|
| 1 | 155,318,353 | rs368485885 | T | . | A |
| 1 | 155,322,142 | rs12239114  | G | . | A |
| 1 | 155,322,147 | rs148991117 | T | . | A |
| 1 | 155,322,211 | rs187173286 | C | . | A |
| 1 | 155,345,043 | rs5005770   | A | . | A |
| 1 | 155,345,056 | rs374205358 | T | . | A |
| 1 | 155,345,077 | rs73008959  | G | . | A |
| 1 | 155,425,259 | rs200624751 | C | . | A |
| 1 | 155,425,261 | rs201199578 | A | . | A |
| 1 | 155,425,263 | rs202244553 | T | . | A |
| 1 | 155,429,490 | rs10796946  | A | . | A |
| 1 | 155,429,496 | rs148527468 | C | . | A |
| 1 | 155,429,526 | rs377185391 | C | . | A |
| 1 | 155,429,538 | rs368436478 | T | . | A |
| 1 | 155,429,543 | rs34323458  | A | . | A |
| 1 | 155,429,548 | rs113404715 | G | . | A |
| 1 | 155,429,725 | rs10908466  | A | . | A |
| 1 | 155,429,806 | rs369773358 | T | . | A |
| 1 | 155,431,171 | rs35202668  | C | . | A |
| 1 | 155,431,172 | rs200825345 | G | . | A |
| 1 | 155,431,173 | rs201831219 | T | . | A |
| 1 | 155,431,193 | rs115024233 | T | . | A |
| 1 | 155,433,942 | rs12724079  | T | C | B |
| 1 | 155,433,971 | rs140724364 | G | . | A |
| 1 | 155,434,017 | rs114909331 | A | . | A |
| 1 | 155,466,784 | rs12079134  | C | . | A |
| 1 | 155,468,732 | rs10908469  | A | . | A |
| 1 | 155,473,356 | rs1360554   | C | T | B |
| 1 | 155,478,861 | rs75976369  | A | . | A |
| 1 | 155,478,897 | rs6688636   | T | C | B |
| 1 | 155,501,014 | rs35615695  | T | C | B |
| 1 | 155,501,096 | rs80047375  | A | . | A |
| 1 | 155,508,882 | rs6696888   | G | A | B |
| 1 | 155,508,901 | rs188296881 | T | . | A |
| 1 | 155,508,922 | rs72995173  | C | . | A |
| 1 | 155,509,107 | rs10752611  | C | . | A |
| 1 | 155,522,572 | rs11264381  | T | . | A |
| 1 | 155,522,603 | rs149023559 | C | . | A |
| 1 | 155,527,013 | rs10908470  | T | . | A |
| 1 | 155,558,665 | rs3892792   | G | . | A |
| 1 | 155,558,738 | rs372288696 | A | . | A |
| 1 | 155,558,761 | rs141307650 | C | . | A |
| 1 | 155,559,170 | rs11264386  | G | . | A |
| 1 | 155,559,174 | rs372699570 | T | . | A |
| 1 | 155,559,185 | rs676670    | T | . | A |
| 1 | 155,559,199 | rs186071702 | G | . | A |
| 1 | 155,581,311 | rs141265144 | T | . | A |
| 1 | 155,581,319 | rs202139573 | G | . | A |
| 1 | 155,581,370 | rs200351491 | G | . | A |

|   |             |             |   |   |   |
|---|-------------|-------------|---|---|---|
| 1 | 155,582,637 | rs201559854 | C | . | A |
| 1 | 155,582,672 | rs139011201 | C | . | A |
| 1 | 155,582,702 | rs150075701 | G | . | A |
| 1 | 155,582,727 | rs149262326 | G | . | A |
| 1 | 155,583,937 | rs147713038 | A | . | A |
| 1 | 155,583,941 | rs375845612 | C | . | A |
| 1 | 155,583,942 | rs145476273 | G | . | A |
| 1 | 155,586,444 | rs3851912   | T | . | A |
| 1 | 155,586,461 | rs61258690  | A | . | A |
| 1 | 155,586,462 | rs185906830 | T | . | A |
| 1 | 155,587,032 | rs200023571 | A | . | A |
| 1 | 155,587,035 | rs144981478 | C | . | A |
| 1 | 155,587,061 | rs143206062 | G | . | A |
| 1 | 155,587,062 | rs371733118 | T | . | A |
| 1 | 155,587,063 | rs376673207 | A | . | A |
| 1 | 155,587,098 | rs148274808 | T | . | A |
| 1 | 155,606,224 | rs4971095   | G | A | B |
| 1 | 155,606,324 | rs111692016 | G | . | A |
| 1 | 155,630,752 | rs3738590   | A | . | A |
| 1 | 155,630,804 | rs377670606 | T | . | A |
| 1 | 155,630,836 | rs139714839 | A | . | A |
| 1 | 155,649,000 | rs489970    | A | . | A |
| 1 | 155,652,081 | rs475550    | T | . | A |
| 1 | 155,653,552 | rs72508345  | C | . | A |
| 1 | 155,653,553 | rs5777951   | T | . | A |
| 1 | 155,653,554 | rs63024560  | T | . | A |
| 1 | 155,653,599 | rs180689315 | C | . | A |
| 1 | 155,656,942 | rs75256783  | G | . | A |
| 1 | 155,682,853 | rs171166    | A | . | A |
| 1 | 155,682,868 | rs186881907 | G | . | A |
| 1 | 155,682,870 | rs56512938  | C | . | A |
| 1 | 155,682,898 | rs139768145 | T | . | A |
| 1 | 155,682,917 | rs375532832 | G | . | A |
| 1 | 155,687,232 | rs621181    | C | . | A |
| 1 | 155,687,277 | rs552778    | G | . | A |
| 1 | 155,719,161 | rs112418368 | T | . | A |
| 1 | 155,719,466 | rs386635696 | G | . | A |
| 1 | 155,721,474 | rs596031    | C | . | A |
| 1 | 155,721,502 | rs140892435 | G | . | A |
| 1 | 155,721,507 | rs199974551 | T | . | A |
| 1 | 155,721,549 | rs374668030 | C | . | A |
| 1 | 155,721,678 | rs3863762   | T | . | A |
| 1 | 155,721,691 | rs190512301 | G | . | A |
| 1 | 155,722,334 | rs623440    | C | . | A |
| 1 | 155,722,345 | rs374300283 | C | . | A |
| 1 | 155,722,364 | rs34391545  | T | . | A |
| 1 | 155,722,395 | rs377411800 | T | . | A |
| 1 | 155,722,403 | rs34838598  | T | . | A |
| 1 | 155,735,675 | rs676814    | A | . | A |



|   |             |             |   |   |   |
|---|-------------|-------------|---|---|---|
| 1 | 155,735,688 | rs201627893 | A | . | A |
| 1 | 155,735,698 | rs267598068 | G | . | A |
| 1 | 155,735,721 | rs677219    | A | . | A |
| 1 | 155,735,723 | rs677220    | T | . | A |
| 1 | 155,735,726 | rs200987293 | T | . | A |
| 1 | 155,735,732 | rs371491793 | T | . | A |
| 1 | 155,735,752 | rs142382216 | A | . | A |
| 1 | 155,735,790 | rs150057388 | G | . | A |
| 1 | 155,737,054 | rs146396042 | C | . | A |
| 1 | 155,737,055 | rs487451    | A | . | A |
| 1 | 155,737,101 | rs488237    | T | . | A |
| 1 | 155,737,104 | rs488240    | A | . | A |
| 1 | 155,737,118 | rs202234781 | A | . | A |
| 1 | 155,737,147 | rs488349    | C | . | A |
| 1 | 155,743,310 | rs708611    | A | C | B |
| 1 | 155,744,487 | rs143645681 | G | . | A |
| 1 | 155,744,509 | rs112412750 | C | . | A |
| 1 | 155,753,676 | rs822019    | A | G | B |
| 1 | 155,753,727 | rs371575442 | G | . | A |
| 1 | 155,753,742 | rs373602803 | T | . | A |
| 1 | 155,764,808 | rs3738591   | C | . | A |
| 1 | 155,764,854 | rs142487782 | T | . | A |
| 1 | 155,764,893 | rs376934806 | G | . | A |
| 1 | 155,783,762 | rs200898321 | T | . | A |
| 1 | 155,783,763 | rs822012    | C | T | B |
| 1 | 155,783,830 | rs115743054 | A | . | A |
| 1 | 155,783,882 | rs192732599 | G | . | A |
| 1 | 155,793,689 | rs822477    | C | A | B |
| 1 | 155,793,752 | rs377224351 | C | . | A |
| 1 | 155,793,757 | rs149516593 | A | . | A |
| 1 | 155,810,293 | rs822497    | T | C | B |
| 1 | 155,810,323 | rs369365982 | G | . | A |
| 1 | 155,822,971 | rs822490    | C | T | B |
| 1 | 155,822,974 | rs201919208 | C | . | A |
| 1 | 155,823,002 | rs822491    | T | C | B |
| 1 | 155,823,029 | rs372837679 | T | . | A |
| 1 | 155,823,033 | rs41264979  | C | . | A |
| 1 | 155,823,050 | rs369296856 | G | . | A |
| 1 | 155,823,078 | rs139134396 | T | . | A |
| 1 | 155,829,510 | rs375004581 | T | . | A |
| 1 | 155,829,511 | rs3820594   | C | . | A |
| 1 | 155,829,535 | rs371110583 | A | . | A |
| 1 | 155,829,551 | rs373914518 | A | . | A |
| 1 | 155,829,573 | rs144636810 | C | . | A |
| 1 | 155,829,584 | rs377646230 | T | . | A |
| 1 | 155,840,706 | rs822519    | C | T | B |
| 1 | 155,840,764 | rs191397830 | C | . | A |
| 1 | 155,840,783 | rs79096273  | T | . | A |
| 1 | 155,840,788 | rs182565567 | T | . | A |

|   |             |             |   |   |          |
|---|-------------|-------------|---|---|----------|
| 1 | 155,843,254 | rs192881572 | T | . | <b>A</b> |
| 1 | 155,843,256 | rs7528441   | T | . | <b>A</b> |
| 1 | 155,843,318 | rs184328077 | T | . | <b>A</b> |
| 1 | 155,846,528 | rs822505    | C | T | <b>B</b> |
| 1 | 155,846,601 | rs143502811 | G | . | <b>A</b> |
| 1 | 155,850,558 | rs822508    | T | C | <b>B</b> |
| 1 | 155,850,585 | rs192002378 | T | . | <b>A</b> |
| 1 | 155,850,588 | rs183430264 | C | . | <b>A</b> |
| 1 | 155,850,811 | rs822509    | G | A | <b>B</b> |
| 1 | 155,850,819 | rs822510    | C | . | <b>A</b> |
| 1 | 155,850,822 | rs187974322 | A | . | <b>A</b> |
| 1 | 155,850,889 | rs192773635 | C | . | <b>A</b> |
| 1 | 155,868,625 | rs2282301   | G | . | <b>A</b> |

Abbreviations: Ch, chromosome; REF, reference nucleotide (dbSNP Build 141); ALT, alternate (non-reference) nucleotide (dbSNP Build 141)

- A. For the consensus AJ N370S haplotype: "A" = dbSNP reference nucleotide; "B" = dbSNP non-reference nucleotide
- B. The region shaded in gray indicates *GBA* intragenic loci

**Supplemental Table 11.** Parental family-based haplotype information (from large sequencing panel)

| Family   | Paternal familial haplotype data |                                           |                                    |                                 | Maternal familial haplotype data |                                           |                                    |                                 |
|----------|----------------------------------|-------------------------------------------|------------------------------------|---------------------------------|----------------------------------|-------------------------------------------|------------------------------------|---------------------------------|
|          | Paternal genotype                | Paternal family member/s used for linkage | Genotype of paternal family member | No. of SNPs in linked haplotype | Maternal genotype                | Maternal family member/s used for linkage | Genotype of maternal family member | No. of SNPs in linked haplotype |
| <b>1</b> | N370S/WT                         | father                                    | N370S/WT                           | 271                             | N370S/WT                         | sister                                    | N370S/WT                           | 231                             |
| <b>2</b> | WT/WT                            | N/A                                       | N/A                                | N/A                             | N370S/WT                         | mother                                    | N370S/WT                           | 113                             |
| <b>3</b> | WT/WT                            | N/A                                       | N/A                                | N/A                             | N370S/V394L                      | mother                                    | V394L/WT                           | 201                             |
|          |                                  |                                           |                                    |                                 |                                  | father                                    | N370S/WT                           | 325                             |
| <b>4</b> | R496H/WT                         | mother                                    | R496H/WT                           | 309                             | N370S/WT                         | mother                                    | N370S/WT                           | 270                             |
|          |                                  | father                                    | WT/WT                              | 336                             |                                  | father                                    | WT/WT                              | 314                             |
| <b>5</b> | N370S/del55                      | mother                                    | del55/WT                           | 302                             | WT/WT                            | N/A                                       | N/A                                | N/A                             |
|          |                                  | father                                    | N370S/WT                           | 191                             |                                  |                                           |                                    |                                 |
| <b>6</b> | N370S/84GG                       | mother                                    | N370S/WT                           | 269                             | WT/WT                            | N/A                                       | N/A                                | N/A                             |
|          |                                  | brother                                   | N370S/WT                           | 327                             |                                  |                                           |                                    |                                 |
| <b>7</b> | WT/WT                            | N/A                                       | N/A                                | N/A                             | N370S/L444P                      | mother                                    | L444P/WT                           | 225                             |
|          |                                  |                                           |                                    |                                 |                                  | father                                    | N370S/WT                           | 291                             |

---

|          |       |     |     |     |            |        |          |     |
|----------|-------|-----|-----|-----|------------|--------|----------|-----|
| <b>8</b> | WT/WT | N/A | N/A | N/A | N370S/84GG | mother | N370S/WT | 321 |
|          |       |     |     |     |            | father | 84GG/WT  | 186 |

---

Abbreviations: WT, wild type; N/A, not applicable

**Supplemental Table 12.** Identification of the paternal allele in the family 1 fetus (large panel)

| Variant data |                    |                       |           |                  |                  | plasma DNA rep         |        | plasma DNA rep   |        | Haplotypes <sup>E</sup> |      |       | FAI <sup>F</sup> |       |
|--------------|--------------------|-----------------------|-----------|------------------|------------------|------------------------|--------|------------------|--------|-------------------------|------|-------|------------------|-------|
| Ch           | Position<br>(hg19) | dbSNP ID <sup>A</sup> | DFM (bps) | PGT <sup>B</sup> | MGT <sup>B</sup> | FL <sup>C</sup><br>(%) | 1-1    |                  | 1-2    |                         | PHiF | PFB   | N370S            | DPAiF |
|              |                    |                       |           |                  |                  |                        | RD (x) | BAF <sup>D</sup> | RD (x) | BAF <sup>D</sup>        |      | N370S | cons             |       |
| 1            | 153,227,177        | rs873234              | 1,978,457 | AB               | BB               |                        | 510    | 95.5%            | 442    | 98.6%                   | A    | B     | -                | WT    |
| 1            | 153,408,831        | rs2026604             | 1,796,803 | AB               | AA               |                        | 2836   | 2.0%             | 603    | 1.3%                    | B    | -     | -                | -     |
| 1            | 153,433,936        | rs12049559            | 1,771,698 | AB               | AA               |                        | 2978   | 46.2%            | 7918   | 24.0%                   | B    | A     | -                | WT    |
| 1            | 153,636,860        | rs4351684             | 1,568,774 | AB               | AA               |                        | 7988   | 17.2%            | 7867   | 1.5%                    | B    | -     | -                | -     |
| 1            | 153,779,412        | rs1127091             | 1,426,222 | AB               | BB               |                        | 2225   | 99.8%            | 3359   | 96.3%                   | A    | -     | -                | -     |
| 1            | 153,780,298        | rs9426938             | 1,425,336 | AB               | BB               |                        | 347    | 95.4%            | 755    | 98.1%                   | A    | -     | -                | -     |
| 1            | 153,886,762        | rs12032914            | 1,318,872 | AB               | AA               | 13.6                   | 1308   | 22.7%            | 867    | 1.2%                    | B    | -     | -                | -     |
| 1            | 153,901,149        | rs3748849             | 1,304,485 | AB               | AA               |                        | 114    | 0.9%             | 582    | 24.6%                   | B    | -     | -                | -     |
| 1            | 153,927,052        | rs10908557            | 1,278,582 | AB               | AA               |                        | 2079   | 9.0%             | 2677   | 0.3%                    | B    | -     | -                | -     |
| 1            | 154,150,911        | rs12063830            | 1,054,723 | AB               | AA               |                        | 752    | 24.5%            | 5448   | 44.3%                   | B    | -     | -                | -     |
| 1            | 154,302,826        | rs6691345             | 902,808   | AB               | AA               |                        | 5003   | 1.3%             | 7385   | 2.9%                    | B    | A     | -                | WT    |
| 1            | 154,791,676        | rs386523173           | 413,958   | AB               | AA               |                        | 7928   | 0.2%             | 7905   | 7.1%                    | B    | A     | -                | WT    |
| 1            | 154,792,269        | rs2798603             | 413,365   | AB               | AA               |                        | 1527   | 1.7%             | 2536   | 1.2%                    | B    | A     | -                | WT    |

|   |             |              |            |           |           |       |             |      |              |          |          |   |           |
|---|-------------|--------------|------------|-----------|-----------|-------|-------------|------|--------------|----------|----------|---|-----------|
| 1 | 155,019,710 | rs11264300   | 185,924    | <b>AB</b> | <b>BB</b> | 385   | 99.7%       | 1001 | <b>97.6%</b> | A        | -        | - | -         |
| 1 | 155,205,634 | <b>N370S</b> | -          | -         | -         | -     | -           | -    | -            | -        | -        | - | -         |
| 1 | 156,230,936 | rs759329     | -1,025,302 | <b>AB</b> | <b>AA</b> | 7941  | 0.9%        | 4733 | <b>12.4%</b> | B        | -        | - | -         |
| 1 | 156,244,992 | rs2270291    | -1,039,358 | <b>AB</b> | <b>AA</b> | 3598  | <b>3.6%</b> | 1703 | 0.3%         | <b>B</b> | <b>A</b> | - | <b>WT</b> |
| 1 | 156,251,742 | rs3806407    | -1,046,108 | <b>AB</b> | <b>AA</b> | 1848  | 0.2%        | 2568 | <b>6.3%</b>  | <b>B</b> | <b>A</b> | - | <b>WT</b> |
| 1 | 156,299,916 | rs12048077   | -1,094,282 | <b>AB</b> | <b>AA</b> | 665   | 1.1%        | 712  | <b>2.4%</b>  | <b>B</b> | <b>A</b> | - | <b>WT</b> |
| 1 | 156,309,372 | rs2296375    | -1,103,738 | <b>AB</b> | <b>AA</b> | 312   | 0.3%        | 1195 | <b>24.5%</b> | <b>B</b> | <b>A</b> | - | <b>WT</b> |
| 1 | 156,387,167 | rs16837375   | -1,181,533 | <b>AB</b> | <b>AA</b> | 7940  | <b>3.4%</b> | 7943 | 0.3%         | <b>B</b> | <b>A</b> | - | <b>WT</b> |
| 1 | 156,799,912 | rs12756019   | -1,594,278 | <b>AB</b> | <b>BB</b> | 862   | 99.5%       | 532  | <b>98.9%</b> | <b>A</b> | <b>B</b> | - | <b>WT</b> |
| 1 | 157,088,386 | rs4661088    | -1,882,752 | <b>AB</b> | <b>AA</b> | 1030  | <b>6.9%</b> | 1562 | <b>3.2%</b>  | <b>B</b> | <b>A</b> | - | <b>WT</b> |
| 1 | 157,090,136 | rs12022068   | -1,884,502 | <b>AB</b> | <b>AA</b> | 7895  | <b>3.0%</b> | 3776 | 0.4%         | <b>B</b> | <b>A</b> | - | <b>WT</b> |
| 1 | 157,090,760 | rs11264618   | -1,885,126 | <b>AB</b> | <b>AA</b> | 6462  | 0.6%        | 2507 | <b>2.9%</b>  | <b>B</b> | <b>A</b> | - | <b>WT</b> |
| 1 | 157,134,406 | rs1176548    | -1,928,772 | <b>AB</b> | <b>BB</b> | 12322 | 1.3%        | 1218 | <b>66.7%</b> | <b>A</b> | <b>B</b> | - | <b>WT</b> |
| 1 | 157,195,934 | rs17415227   | -1,990,300 | <b>AB</b> | <b>AA</b> | 3857  | <b>6.1%</b> | 372  | <b>31.7%</b> | B        | -        | - | -         |

Abbreviations and footnotes are the same as in Supplemental Table 6.

**Supplemental Table 13.** Identification of the maternal allele in the family 1 fetus (large panel)

| Variant data |                    |                       |           |                  |                  | plasma DNA rep         |        | plasma DNA rep   |        | Haplotypes <sup>E</sup> |      |       | FAI <sup>F</sup> |       |
|--------------|--------------------|-----------------------|-----------|------------------|------------------|------------------------|--------|------------------|--------|-------------------------|------|-------|------------------|-------|
| Ch           | Position<br>(hg19) | dbSNP ID <sup>A</sup> | DFM (bps) | PGT <sup>B</sup> | MGT <sup>B</sup> | FL <sup>C</sup><br>(%) | 1-1    |                  | 1-2    |                         | MHIF | MFB   | N370S            | DMAiF |
|              |                    |                       |           |                  |                  |                        | RD (x) | BAF <sup>D</sup> | RD (x) | BAF <sup>D</sup>        |      | N370S | cons             |       |
| 1            | 153,334,525        | rs1560833             | 1,871,109 | AA               | AB               |                        | 894    | 37.2%            | 571    | 17.5%                   | A    | -     | -                | -     |
| 1            | 153,637,404        | rs6427671             | 1,568,230 | BB               | AB               |                        | 174    | 61.5%            | 381    | 99.5%                   | B    | -     | -                | -     |
| 1            | 154,239,283        | rs1212352             | 966,351   | AA               | AB               |                        | 14973  | 1.5%             | 6539   | 13.1%                   | A    | A     | -                | N370S |
| 1            | 154,259,275        | rs1760802             | 946,359   | AA               | AB               |                        | 1499   | 3.3%             | 846    | 8.2%                    | A    | A     | -                | N370S |
| 1            | 154,591,882        | rs56020456            | 613,752   | AA               | AB               |                        | 957    | 1.5%             | 1979   | 22.7%                   | A    | -     | -                | -     |
| 1            | 154,688,197        | rs11264248            | 517,437   | AA               | AB               |                        | 11237  | 19.9%            | 7794   | 14.8%                   | A    | -     | -                | -     |
| 1            | 154,910,012        | rs877343              | 295,622   | BB               | AB               | 13.6                   | 137    | 97.1%            | 169    | 74.0%                   | B    | -     | -                | -     |
| 1            | 155,047,719        | rs11264307            | 157,915   | AA               | AB               |                        | 1125   | 1.0%             | 605    | 0.5%                    | A    | -     | -                | -     |
| 1            | 155,079,477        | rs7367207             | 126,157   | AA               | AB               |                        | 845    | 30.1%            | 179    | 35.2%                   | A    | -     | A <sup>G</sup>   | N370S |
| 1            | 155,135,335        | rs4460629             | 70,299    | AA               | AB               |                        | 212    | 0.9%             | 279    | 6.1%                    | A    | -     | A <sup>G</sup>   | N370S |
| 1            | 155,140,648        | rs11264339            | 64,986    | AA               | AB               |                        | 7943   | 9.3%             | 7932   | 19.6%                   | A    | -     | A <sup>G</sup>   | N370S |
| 1            | 155,205,634        | N370S                 | -         | -                | -                |                        | -      | -                | -      | -                       | -    | -     | -                | -     |
| 1            | 155,213,124        | rs11264345            | -7,490    | AA               | AB               |                        | 7706   | 36.5%            | 5395   | 2.3%                    | A    | A     | A                | N370S |

|   |             |             |            |           |           |      |       |       |       |          |          |          |              |
|---|-------------|-------------|------------|-----------|-----------|------|-------|-------|-------|----------|----------|----------|--------------|
| 1 | 155,224,091 | rs2075566   | -18,457    | <b>AA</b> | <b>AB</b> | 1825 | 10.0% | 1832  | 20.4% | <b>A</b> | <b>A</b> | <b>A</b> | <b>N370S</b> |
| 1 | 155,230,131 | rs386580544 | -24,497    | <b>AA</b> | <b>AB</b> | 7781 | 40.2% | 7691  | 16.7% | <b>A</b> | <b>A</b> | <b>A</b> | <b>N370S</b> |
| 1 | 155,235,493 | rs386515223 | -29,859    | <b>AA</b> | <b>AB</b> | 1462 | 29.8% | 758   | 3.8%  | <b>A</b> | <b>A</b> | <b>A</b> | <b>N370S</b> |
| 1 | 155,239,624 | rs2361543   | -33,990    | <b>AA</b> | <b>AB</b> | 1110 | 23.5% | 525   | 0.2%  | <b>A</b> | <b>A</b> | <b>A</b> | <b>N370S</b> |
| 1 | 155,282,829 | rs11264359  | -77,195    | <b>AA</b> | <b>AB</b> | 7969 | 20.9% | 7951  | 2.3%  | <b>A</b> | <b>A</b> | <b>A</b> | <b>N370S</b> |
| 1 | 155,322,142 | rs12239114  | -116,508   | <b>AA</b> | <b>AB</b> | 950  | 0.8%  | 167   | 40.1% | <b>A</b> | <b>A</b> | <b>A</b> | <b>N370S</b> |
| 1 | 155,429,725 | rs10908466  | -224,091   | <b>AA</b> | <b>AB</b> | 1531 | 1.8%  | 14738 | 4.2%  | <b>A</b> | <b>A</b> | <b>A</b> | <b>N370S</b> |
| 1 | 155,630,752 | rs3738590   | -425,118   | <b>AA</b> | <b>AB</b> | 7941 | 1.2%  | 7866  | 28.9% | <b>A</b> | <b>A</b> | <b>A</b> | <b>N370S</b> |
| 1 | 155,822,971 | rs822490    | -617,337   | <b>BB</b> | <b>AB</b> | 690  | 97.7% | 224   | 72.3% | <b>B</b> | <b>B</b> | <b>B</b> | <b>N370S</b> |
| 1 | 156,055,099 | rs12076700  | -849,465   | <b>AA</b> | <b>AB</b> | 1602 | 19.1% | 1549  | 27.5% | <b>A</b> | <b>A</b> | -        | <b>N370S</b> |
| 1 | 156,055,185 | rs12063564  | -849,551   | <b>AA</b> | <b>AB</b> | 8061 | 2.6%  | 2224  | 27.2% | <b>A</b> | <b>A</b> | -        | <b>N370S</b> |
| 1 | 156,650,909 | rs11264516  | -1,445,275 | <b>AA</b> | <b>AB</b> | 130  | 0.0%  | 135   | 0.7%  | <b>A</b> | -        | -        | -            |
| 1 | 156,678,291 | rs67794440  | -1,472,657 | <b>AA</b> | <b>AB</b> | 256  | 1.2%  | 2816  | 1.4%  | <b>A</b> | -        | -        | -            |

Abbreviations and footnotes are the same as in Supplemental Table 8 with the following additional footnote:

G. Near consensus N370S haplotype as determined according to Figure 4.



**Supplemental Table 14.** Identification of the maternal allele in the family 2 fetus (large panel)

| Variant data |                    |                       |           |                  |                  | plasma DNA rep         |        | plasma DNA rep   |        | Haplotypes <sup>E</sup> |      |       | FAI <sup>F</sup> |       |
|--------------|--------------------|-----------------------|-----------|------------------|------------------|------------------------|--------|------------------|--------|-------------------------|------|-------|------------------|-------|
| Ch           | Position<br>(hg19) | dbSNP ID <sup>A</sup> | DFM (bps) | PGT <sup>B</sup> | MGT <sup>B</sup> | FL <sup>C</sup><br>(%) | 2-1    |                  | 2-2    |                         | MHIF | MFB   | N370S            | DMAiF |
|              |                    |                       |           |                  |                  |                        | RD (x) | BAF <sup>D</sup> | RD (x) | BAF <sup>D</sup>        |      | N370S | cons             |       |
| 1            | 153,283,495        | rs2987760             | 1,922,139 | BB               | AB               |                        | 309    | 99.7%            | 163    | 98.8%                   | B    | -     | -                | -     |
| 1            | 153,283,978        | rs821420              | 1,921,656 | AA               | AB               |                        | 2890   | 2.7%             | 930    | 1.8%                    | A    | -     | -                | -     |
| 1            | 153,334,525        | rs1560833             | 1,871,109 | AA               | AB               |                        | 7311   | 17.9%            | 504    | 6.3%                    | A    | A     | -                | N370S |
| 1            | 153,388,881        | rs3014812             | 1,816,753 | AA               | AB               |                        | 7542   | 13.1%            | 2609   | 2.1%                    | A    | -     | -                | -     |
| 1            | 153,475,660        | rs16835382            | 1,729,974 | BB               | AB               |                        | 3752   | 65.2%            | 1492   | 84.6%                   | B    | -     | -                | -     |
| 1            | 153,591,652        | rs9726753             | 1,613,982 | AA               | AB               |                        | 900    | 4.2%             | 389    | 39.8%                   | A    | A     | -                | N370S |
| 1            | 154,192,143        | rs9803862             | 1,013,491 | AA               | AB               | 9.2                    | 186    | 27.4%            | 1086   | 11.2%                   | A    | -     | -                | -     |
| 1            | 154,206,212        | rs10797061            | 999,422   | AA               | AB               |                        | 644    | 1.9%             | 873    | 8.9%                    | A    | -     | -                | -     |
| 1            | 154,219,485        | rs1194580             | 986,149   | AA               | AB               |                        | 169    | 0.6%             | 459    | 0.4%                    | A    | -     | -                | -     |
| 1            | 154,219,718        | rs6427509             | 985,916   | AA               | AB               |                        | 4968   | 17.7%            | 6617   | 0.3%                    | A    | -     | -                | -     |
| 1            | 154,308,680        | rs9787014             | 896,954   | AA               | AB               |                        | 7906   | 24.3%            | 677    | 34.4%                   | A    | -     | -                | -     |
| 1            | 154,310,048        | rs1760795             | 895,586   | AA               | AB               |                        | 193    | 0.0%             | 668    | 32.0%                   | A    | -     | -                | -     |
| 1            | 154,411,419        | rs4845622             | 794,215   | AA               | AB               |                        | 2041   | 1.6%             | 192    | 15.6%                   | A    | -     | -                | -     |

|   |             |              |            |    |    |      |       |      |        |   |   |                |       |
|---|-------------|--------------|------------|----|----|------|-------|------|--------|---|---|----------------|-------|
| 1 | 154,554,357 | rs11264222   | 651,277    | AA | AB | 4701 | 30.8% | 1445 | 36.4%  | A | A | -              | N370S |
| 1 | 154,573,967 | rs386561757  | 631,667    | BB | AB | 7746 | 98.9% | 167  | 100.0% | B | B | -              | N370S |
| 1 | 154,677,716 | rs56320421   | 527,918    | AA | AB | 7966 | 44.9% | 7070 | 0.7%   | A | - | -              | -     |
| 1 | 154,678,537 | rs61811430   | 527,097    | AA | AB | 7971 | 29.1% | 7869 | 24.2%  | A | - | -              | -     |
| 1 | 154,688,197 | rs11264248   | 517,437    | BB | AB | 7856 | 78.8% | 7827 | 74.0%  | B | - | -              | -     |
| 1 | 154,790,480 | rs35612271   | 415,154    | AA | AB | 7898 | 27.6% | 2431 | 2.6%   | A | - | -              | -     |
| 1 | 155,205,634 | <b>N370S</b> | -          | -  | -  | -    | -     | -    | -      | - | - | -              | -     |
| 1 | 155,282,829 | rs11264359   | -77,195    | AA | AB | 7964 | 32.8% | 7960 | 25.9%  | A | - | A              | N370S |
| 1 | 155,433,942 | rs12724079   | -228,308   | BB | AB | 539  | 63.3% | 103  | 96.1%  | B | - | B              | N370S |
| 1 | 155,466,784 | rs12079134   | -261,150   | AA | AB | 2129 | 27.1% | 420  | 0.0%   | A | - | A              | N370S |
| 1 | 155,846,528 | rs822505     | -640,894   | BB | AB | 1125 | 99.1% | 717  | 95.7%  | B | - | B              | N370S |
| 1 | 155,880,159 | rs867549     | -674,525   | AA | AB | 7863 | 31.7% | 5350 | 1.4%   | A | - | A <sup>G</sup> | N370S |
| 1 | 156,287,360 | rs2249790    | -1,081,726 | AA | AB | 648  | 36.7% | 7901 | 0.3%   | A | A | A <sup>G</sup> | N370S |
| 1 | 157,104,470 | rs6704373    | -1,898,836 | AA | AB | 7847 | 0.6%  | 169  | 22.5%  | A | - | -              | -     |
| 1 | 157,113,029 | rs7544727    | -1,907,395 | AA | AB | 2306 | 0.7%  | 275  | 0.0%   | A | - | -              | -     |

Abbreviations and footnotes are the same as in Supplemental Table 13.

**Supplemental Table 15.** Identification of the maternal allele in the family 3 fetus (large panel)

| Variant data |                    |                       |           |                  |                  |                        | plasma DNA |                  | plasma DNA |                  | Haplotypes <sup>E</sup> |       |       |       | FAI <sup>F</sup> |
|--------------|--------------------|-----------------------|-----------|------------------|------------------|------------------------|------------|------------------|------------|------------------|-------------------------|-------|-------|-------|------------------|
| Ch           | Position<br>(hg19) | dbSNP ID <sup>A</sup> | DFM (bps) | PGT <sup>B</sup> | MGT <sup>B</sup> | FL <sup>C</sup><br>(%) | rep 3-1    |                  | rep 3-2    |                  | MHIF                    | MFB   | MFB   | N370S | DMAiF            |
|              |                    |                       |           |                  |                  |                        | RD (x)     | BAF <sup>D</sup> | RD<br>(x)  | BAF <sup>D</sup> |                         | N370S | V394L | cons  |                  |
| 1            | 153,221,315        | rs121311158           | 1,984,319 | AA               | AB               |                        | 4234       | 1.5%             | 7937       | 1.5%             | A                       | -     | -     | -     | -                |
| 1            | 153,327,732        | rs2916198             | 1,877,902 | AA               | AB               |                        | 590        | 32.9%            | 1367       | 28.3%            | A                       | A     | -     | -     | N370S            |
| 1            | 154,239,283        | rs1212352             | 966,351   | AA               | AB               |                        | 7897       | 24.9%            | 7908       | 9.3%             | A                       | -     | -     | -     | -                |
| 1            | 154,325,149        | rs2483712             | 880,485   | BB               | AB               |                        | 7899       | 88.8%            | 4805       | 80.6%            | B                       | B     | -     | -     | N370S            |
| 1            | 154,426,947        | rs8192283             | 778,687   | AA               | AB               |                        | 3541       | 36.8%            | 3500       | 41.9%            | A                       | A     | -     | -     | N370S            |
| 1            | 154,451,420        | rs11265622            | 754,214   | BB               | AB               |                        | 2848       | 68.2%            | 6497       | 75.8%            | B                       | B     | -     | -     | N370S            |
| 1            | 154,514,331        | rs4845647             | 691,303   | BB               | AB               | 3.4                    | 1823       | 65.1%            | 2381       | 78.7%            | B                       | B     | -     | -     | N370S            |
| 1            | 154,514,338        | rs4845648             | 691,296   | AA               | AB               |                        | 1769       | 33.4%            | 2291       | 18.3%            | A                       | A     | -     | -     | N370S            |
| 1            | 154,682,082        | rs10908427            | 523,552   | AA               | AB               |                        | 1009       | 3.6%             | 526        | 6.7%             | A                       | -     | B     | -     | N370S            |
| 1            | 154,760,595        | rs1777910             | 445,039   | BB               | AB               |                        | 3106       | 67.3%            | 1292       | 71.4%            | B                       | B     | -     | -     | N370S            |
| 1            | 154,779,122        | rs906274              | 426,512   | AA               | AB               |                        | 7968       | 0.7%             | 3157       | 1.0%             | A                       | A     | -     | -     | N370S            |
| 1            | 154,784,466        | rs7513480             | 421,168   | AA               | AB               |                        | 7812       | 31.9%            | 2676       | 27.5%            | A                       | A     | B     | -     | N370S            |
| 1            | 155,205,634        | N370S                 | -         | -                | -                |                        | -          | -                | -          | -                | -                       | -     | -     | -     | -                |

|   |             |            |            |           |           |      |       |      |       |          |          |   |   |              |
|---|-------------|------------|------------|-----------|-----------|------|-------|------|-------|----------|----------|---|---|--------------|
| 1 | 156,127,368 | rs12128066 | -921,734   | <b>AA</b> | <b>AB</b> | 7559 | 11.7% | 948  | 41.1% | <b>A</b> | <b>A</b> | - | - | <b>N370S</b> |
| 1 | 156,382,470 | rs12401436 | -1,176,836 | <b>AA</b> | <b>AB</b> | 1435 | 6.1%  | 2465 | 42.2% | <b>A</b> | <b>A</b> | - | - | <b>N370S</b> |
| 1 | 156,387,167 | rs16837375 | -1,181,533 | <b>AA</b> | <b>AB</b> | 7966 | 35.9% | 7974 | 28.4% | <b>A</b> | <b>A</b> | - | - | <b>N370S</b> |
| 1 | 156,701,372 | rs73000798 | -1,495,738 | <b>AA</b> | <b>AB</b> | 5135 | 28.5% | 7915 | 8.7%  | <b>A</b> | <b>A</b> | - | - | <b>N370S</b> |

Abbreviations and footnotes are the same as in Supplemental Table 13 with the following footnote and abbreviation modifications:

- E. The maternal fetal haplotype (MHiF) was determined from SNP III data (as described in Supplemental Methods); the maternal N370S-linked (MFB N370S) and maternal V394L-linked (MFB V394L) haplotypes were determined by family-based linkage analysis; the N370S consensus haplotype (N370S cons) was derived according to Figure 2. An "-" indicates that no haplotype data was available at the given position. Bold alleles were used for diagnosis of the maternal allele in the fetus ("DMAiF").
- F. Fetal allele identity (FAI) was determined by comparing the "MHiF" haplotype to the "MFB N370S", "MFB V394L", and/or "N370S cons" haplotypes

**Supplemental Table 16.** Identification of the paternal allele in the family 4 fetus (large panel)

| Variant data |                    |                       |            |                  |                  |                        | plasma DNA rep |                  | plasma DNA rep |                  | Haplotypes <sup>E</sup> |       |     | FAI <sup>F</sup> |
|--------------|--------------------|-----------------------|------------|------------------|------------------|------------------------|----------------|------------------|----------------|------------------|-------------------------|-------|-----|------------------|
| Ch           | Position<br>(hg19) | dbSNP ID <sup>A</sup> | DFM (bps)  | PGT <sup>B</sup> | MGT <sup>B</sup> | FL <sup>C</sup><br>(%) | 4-1            |                  | 4-2            |                  | PHiF                    | PFB   | PFB | DPAiF            |
|              |                    |                       |            |                  |                  |                        | RD (x)         | BAF <sup>D</sup> | RD (x)         | BAF <sup>D</sup> |                         | R496H | WT  |                  |
| 1            | 154,464,572        | rs4478801             | 740,221    | AB               | AA               |                        | 7963           | 3.2%             | 7954           | 0.3%             | B                       | -     | -   | -                |
| 1            | 154,492,432        | rs4518898             | 712,361    | AB               | BB               |                        | 1599           | 98.9%            | 561            | 99.8%            | A                       | B     | -   | WT               |
| 1            | 154,526,414        | rs7539745             | 678,379    | AB               | BB               |                        | 7626           | 100.0%           | 7725           | 98.7%            | A                       | B     | -   | WT               |
| 1            | 154,774,966        | rs6690891             | 429,827    | AB               | AA               |                        | 7696           | 1.1%             | 7552           | 2.1%             | B                       | A     | -   | WT               |
| 1            | 155,186,742        | rs1057941             | 18,051     | AB               | AA               |                        | 3226           | 0.8%             | 2770           | 2.1%             | B                       | A     | B   | WT               |
| 1            | 155,197,602        | rs2990246             | 7,191      | AB               | AA               |                        | 3625           | 1.7%             | 2985           | 0.2%             | B                       | A     | -   | WT               |
| 1            | 155,204,793        | <b>R496H</b>          | -          | -                | -                | 5.6                    | -              | -                | -              | -                | -                       | -     | -   | -                |
| 1            | 155,581,311        | rs141265144           | -376,518   | AB               | AA               |                        | 7889           | 0.5%             | 7850           | 5.9%             | B                       | -     | -   | -                |
| 1            | 156,230,546        | rs12142808            | -1,025,753 | AB               | AA               |                        | 2931           | 1.1%             | 3520           | 1.7%             | B                       | -     | B   | WT               |
| 1            | 156,314,147        | rs12022657            | -1,109,354 | AB               | AA               |                        | 721            | 0.8%             | 939            | 2.6%             | B                       | -     | B   | WT               |
| 1            | 156,618,768        | rs4661209             | -1,413,975 | AB               | BB               |                        | 675            | 95.1%            | 1008           | 97.9%            | A                       | B     | -   | WT               |
| 1            | 156,623,625        | rs10908513            | -1,418,832 | AB               | BB               |                        | 4848           | 98.0%            | 7440           | 99.1%            | A                       | -     | -   | -                |
| 1            | 156,671,469        | rs12406221            | -1,466,676 | AB               | BB               |                        | 1009           | 94.3%            | 1970           | 99.4%            | A                       | -     | A   | WT               |

|   |             |           |            |           |           |      |              |      |              |          |          |          |           |
|---|-------------|-----------|------------|-----------|-----------|------|--------------|------|--------------|----------|----------|----------|-----------|
| 1 | 157,061,220 | rs6677868 | -1,856,427 | <b>AB</b> | <b>BB</b> | 5358 | <b>62.5%</b> | 7764 | <b>93.2%</b> | <b>A</b> | <b>B</b> | <b>A</b> | <b>WT</b> |
| 1 | 157,135,165 | rs1176550 | -1,930,372 | <b>AB</b> | <b>BB</b> | 6826 | 98.9%        | 7138 | <b>95.4%</b> | <b>A</b> | <b>B</b> | -        | <b>WT</b> |
| 1 | 157,137,112 | rs1176556 | -1,932,319 | <b>AB</b> | <b>BB</b> | 696  | <b>96.1%</b> | 624  | 99.8%        | <b>A</b> | <b>B</b> | -        | <b>WT</b> |

Abbreviations and footnotes are the same as in Supplemental Table 6 with the following footnote and abbreviation modifications:

- E. The paternal fetal haplotype (PHiF) was determined from SNP II data (as described in Supplemental Methods); the paternal R496H-linked (PFB R496H) and wild type-linked (PFB WT) haplotypes were determined from family-based linkage analysis. An "-" indicates that no haplotype data was available at the given position. Bold alleles were used for diagnosis of the paternal allele in the fetus ("DPAiF").
- F. Fetal allele identity (FAI) was determined by comparing the "PHiF" haplotype to the "PFB R496H" and/or "PFB WT" haplotypes.

**Supplemental Table 17.** Identification of the maternal allele in the family 4 fetus (large panel)

| Variant data |                    |                       |           |                  |                  |                        | plasma DNA |                  | plasma DNA |                  | Haplotypes <sup>E</sup> |       |     |       | FAI <sup>F</sup> |
|--------------|--------------------|-----------------------|-----------|------------------|------------------|------------------------|------------|------------------|------------|------------------|-------------------------|-------|-----|-------|------------------|
| Ch           | Position<br>(hg19) | dbSNP ID <sup>A</sup> | DFM (bps) | PGT <sup>B</sup> | MGT <sup>B</sup> | FL <sup>C</sup><br>(%) | rep 4-1    |                  | rep 4-2    |                  | MHIF                    | MFB   | MFB | N370S | DMAiF            |
|              |                    |                       |           |                  |                  |                        | RD (x)     | BAF <sup>D</sup> | RD<br>(x)  | BAF <sup>D</sup> |                         | N370S | WT  | cons  |                  |
| 1            | 153,218,349        | rs11583609            | 1,987,285 | AA               | AB               |                        | 111        | 4.5%             | 579        | 27.8%            | A                       | -     | A   | -     | WT               |
| 1            | 153,221,635        | rs12760683            | 1,983,999 | AA               | AB               |                        | 374        | 5.3%             | 348        | 26.1%            | A                       | -     | A   | -     | WT               |
| 1            | 153,266,256        | rs11585177            | 1,939,378 | AA               | AB               |                        | 4743       | 39.6%            | 7773       | 42.0%            | A                       | -     | A   | -     | WT               |
| 1            | 153,293,934        | rs2916230             | 1,911,700 | AA               | AB               |                        | 539        | 19.1%            | 569        | 32.0%            | A                       | -     | A   | -     | WT               |
| 1            | 153,294,653        | rs2916229             | 1,910,981 | AA               | AB               |                        | 891        | 19.3%            | 690        | 35.5%            | A                       | -     | A   | -     | WT               |
| 1            | 153,309,981        | rs12139503            | 1,895,653 | AA               | AB               |                        | 7918       | 19.2%            | 6346       | 28.8%            | A                       | -     | A   | -     | WT               |
| 1            | 153,753,725        | rs10908474            | 1,451,909 | AA               | AB               | 5.6                    | 1983       | 40.3%            | 817        | 41.1%            | A                       | -     | -   | -     | -                |
| 1            | 153,833,591        | rs7552274             | 1,372,043 | AA               | AB               |                        | 1744       | 35.8%            | 3921       | 33.1%            | A                       | -     | -   | -     | -                |
| 1            | 153,851,106        | rs12041920            | 1,354,528 | AA               | AB               |                        | 610        | 35.9%            | 1043       | 18.5%            | A                       | -     | -   | -     | -                |
| 1            | 153,901,149        | rs3748849             | 1,304,485 | AA               | AB               |                        | 987        | 23.3%            | 1532       | 7.5%             | A                       | -     | -   | -     | -                |
| 1            | 153,919,756        | rs946682              | 1,285,878 | AA               | AB               |                        | 4790       | 27.9%            | 4746       | 30.7%            | A                       | -     | -   | -     | -                |
| 1            | 153,926,078        | rs11264680            | 1,279,556 | AA               | AB               |                        | 1533       | 14.5%            | 708        | 38.0%            | A                       | -     | -   | -     | -                |
| 1            | 153,992,734        | rs12048137            | 1,212,900 | AA               | AB               |                        | 7933       | 23.3%            | 4701       | 16.6%            | A                       | -     | -   | -     | -                |

|   |             |              |            |           |           |      |       |      |       |          |          |          |                      |           |
|---|-------------|--------------|------------|-----------|-----------|------|-------|------|-------|----------|----------|----------|----------------------|-----------|
| 1 | 154,692,883 | rs7554577    | 512,751    | <b>AA</b> | <b>AB</b> | 1228 | 19.5% | 1696 | 43.6% | <b>A</b> | -        | -        | -                    | -         |
| 1 | 154,796,520 | rs11264268   | 409,114    | <b>AA</b> | <b>AB</b> | 3522 | 41.9% | 6169 | 24.9% | <b>A</b> | -        | -        | -                    | -         |
| 1 | 154,822,517 | rs906597     | 383,117    | <b>AA</b> | <b>AB</b> | 1924 | 21.7% | 5691 | 9.9%  | <b>A</b> | -        | <b>A</b> | -                    | <b>WT</b> |
| 1 | 155,106,054 | rs4390169    | 99,580     | <b>AA</b> | <b>AB</b> | 763  | 31.8% | 945  | 15.2% | <b>A</b> | <b>B</b> | -        | <b>B<sup>G</sup></b> | <b>WT</b> |
| 1 | 155,106,227 | rs4745       | 99,407     | <b>AA</b> | <b>AB</b> | 7376 | 37.3% | 6730 | 19.6% | <b>A</b> | <b>B</b> | -        | <b>B<sup>G</sup></b> | <b>WT</b> |
| 1 | 155,205,634 | <b>N370S</b> | -          | -         | -         | -    | -     | -    | -     | -        | -        | -        | -                    | -         |
| 1 | 155,870,416 | rs1749409    | -664,782   | <b>BB</b> | <b>AB</b> | 593  | 62.6% | 245  | 56.3% | <b>B</b> | -        | -        | <b>A<sup>G</sup></b> | <b>WT</b> |
| 1 | 155,917,880 | rs1010033    | -712,246   | <b>BB</b> | <b>AB</b> | 373  | 93.8% | 336  | 66.4% | <b>B</b> | -        | -        | <b>A<sup>G</sup></b> | <b>WT</b> |
| 1 | 156,089,920 | rs610918     | -884,286   | <b>AA</b> | <b>AB</b> | 1400 | 7.1%  | 5112 | 8.7%  | <b>A</b> | -        | -        | <b>B<sup>G</sup></b> | <b>WT</b> |
| 1 | 156,093,195 | rs693671     | -887,561   | <b>AA</b> | <b>AB</b> | 7743 | 18.5% | 6812 | 25.9% | <b>A</b> | -        | -        | <b>B<sup>G</sup></b> | <b>WT</b> |
| 1 | 156,099,830 | rs666869     | -894,196   | <b>AA</b> | <b>AB</b> | 368  | 5.4%  | 1429 | 2.8%  | <b>A</b> | -        | -        | <b>B<sup>G</sup></b> | <b>WT</b> |
| 1 | 156,106,863 | rs553016     | -901,229   | <b>AA</b> | <b>AB</b> | 364  | 37.9% | 170  | 18.8% | <b>A</b> | -        | -        | <b>B<sup>G</sup></b> | <b>WT</b> |
| 1 | 156,117,584 | rs72708271   | -911,950   | <b>AA</b> | <b>AB</b> | 611  | 12.1% | 1677 | 37.2% | <b>A</b> | -        | -        | <b>B<sup>G</sup></b> | <b>WT</b> |
| 1 | 156,241,701 | rs2246476    | -1,036,067 | <b>AA</b> | <b>AB</b> | 7916 | 26.6% | 3974 | 31.9% | <b>A</b> |          | <b>A</b> | <b>B<sup>G</sup></b> | <b>WT</b> |
| 1 | 156,246,473 | rs7542045    | -1,040,839 | <b>BB</b> | <b>AB</b> | 3250 | 67.4% | 3173 | 74.5% | <b>B</b> | <b>A</b> | <b>B</b> | <b>A<sup>G</sup></b> | <b>WT</b> |
| 1 | 156,508,477 | rs1177696    | -1,302,843 | <b>BB</b> | <b>AB</b> | 7873 | 54.5% | 7895 | 86.4% | <b>B</b> | <b>A</b> | -        | -                    | <b>WT</b> |
| 1 | 156,518,379 | rs744224     | -1,312,745 | <b>BB</b> | <b>AB</b> | 1548 | 62.1% | 1235 | 59.8% | <b>B</b> | <b>A</b> | -        | -                    | <b>WT</b> |
| 1 | 156,519,799 | rs1778820    | -1,314,165 | <b>BB</b> | <b>AB</b> | 144  | 65.3% | 312  | 94.9% | <b>B</b> | <b>A</b> | -        | -                    | <b>WT</b> |



|   |             |            |            |           |           |      |       |      |       |          |          |          |   |           |
|---|-------------|------------|------------|-----------|-----------|------|-------|------|-------|----------|----------|----------|---|-----------|
| 1 | 156,534,539 | rs4661185  | -1,328,905 | <b>AA</b> | <b>AB</b> | 6599 | 14.0% | 7342 | 18.5% | <b>A</b> | <b>B</b> | -        | - | <b>WT</b> |
| 1 | 156,626,508 | rs34478535 | -1,420,874 | <b>AA</b> | <b>AB</b> | 1427 | 34.0% | 2207 | 31.2% | A        | -        | -        | - | -         |
| 1 | 156,645,948 | rs77658164 | -1,440,314 | <b>AA</b> | <b>AB</b> | 226  | 32.3% | 408  | 17.4% | A        | -        | -        | - | -         |
| 1 | 156,660,311 | rs4384231  | -1,454,677 | <b>AA</b> | <b>AB</b> | 956  | 21.8% | 114  | 12.3% | <b>A</b> | -        | <b>A</b> | - | <b>WT</b> |
| 1 | 157,194,156 | rs12126856 | -1,988,522 | <b>AA</b> | <b>AB</b> | 4868 | 39.7% | 6041 | 31.7% | <b>A</b> | -        | <b>A</b> | - | <b>WT</b> |
| 1 | 157,194,578 | rs11264636 | -1,988,944 | <b>AA</b> | <b>AB</b> | 994  | 20.5% | 280  | 27.9% | <b>A</b> | -        | <b>A</b> | - | <b>WT</b> |
| 1 | 157,196,031 | rs10908543 | -1,990,397 | <b>AA</b> | <b>AB</b> | 343  | 8.5%  | 242  | 5.8%  | <b>A</b> | -        | <b>A</b> | - | <b>WT</b> |

Abbreviations and footnotes are the same as in Supplemental Table 13 with the following footnote and abbreviation modifications:

- E. The maternal fetal haplotype (MHiF) was determined from SNP III data (as described in Supplemental Methods); the maternal N370S-linked (MFB N370S) and maternal wild type-linked (MFB WT) haplotypes were determined by family-based linkage analysis; the N370S consensus haplotype (N370S cons) was derived according to Figure 2. An "-" indicates that no haplotype data was available at the given position. Bold alleles were used for diagnosis of the maternal allele in the fetus ("DMAiF").
- F. Fetal allele identity (FAI) was determined by comparing the "MHiF" haplotype to the "MFB N370S", "MFB WT", and/or "N370S cons" haplotypes

**Supplemental Table 18.** Identification of the paternal allele in the family 5 fetus (large panel)

| Variant data |                    |                       |           |                  |                  |                        | plasma DNA |                  | plasma DNA |                  | Haplotypes <sup>E</sup> |          |          |       | FAI <sup>F</sup> |
|--------------|--------------------|-----------------------|-----------|------------------|------------------|------------------------|------------|------------------|------------|------------------|-------------------------|----------|----------|-------|------------------|
| Ch           | Position<br>(hg19) | dbSNP ID <sup>A</sup> | DFM (bps) | PGT <sup>B</sup> | MGT <sup>B</sup> | FL <sup>C</sup><br>(%) | rep 5-1    |                  | rep 5-2    |                  | PHiF                    | PFB      | PFB      | N370S | DPAiF            |
|              |                    |                       |           |                  |                  |                        | RD (x)     | BAF <sup>D</sup> | RD<br>(x)  | BAF <sup>D</sup> |                         | N370S    | del55    | cons  |                  |
| 1            | 153,609,039        | rs4845557             | 1,596,595 | <b>AB</b>        | <b>BB</b>        |                        | 656        | <b>98.3%</b>     | 986        | <b>96.6%</b>     | A                       | -        | -        | -     | -                |
| 1            | 153,612,053        | rs2274740             | 1,593,581 | <b>AB</b>        | <b>BB</b>        |                        | 714        | 99.6%            | 558        | <b>98.6%</b>     | A                       | -        | -        | -     | -                |
| 1            | 153,622,220        | rs913861              | 1,583,414 | <b>AB</b>        | <b>BB</b>        |                        | 606        | <b>93.2%</b>     | 684        | <b>98.0%</b>     | A                       | -        | -        | -     | -                |
| 1            | 153,636,860        | rs4351684             | 1,568,774 | <b>AB</b>        | <b>BB</b>        |                        | 7980       | <b>96.0%</b>     | 7878       | <b>98.6%</b>     | A                       | -        | -        | -     | -                |
| 1            | 153,869,946        | rs12401565            | 1,335,688 | <b>AB</b>        | <b>AA</b>        |                        | 3237       | 0.3%             | 1118       | <b>5.2%</b>      | <b>B</b>                | -        | <b>A</b> | -     | <b>N370S</b>     |
| 1            | 153,908,309        | rs11586075            | 1,297,325 | <b>AB</b>        | <b>AA</b>        |                        | 2812       | 1.2%             | 4687       | <b>5.9%</b>      | <b>B</b>                | -        | <b>A</b> | -     | <b>N370S</b>     |
| 1            | 153,919,756        | rs946682              | 1,285,878 | <b>AB</b>        | <b>AA</b>        | 5.8                    | 7978       | 0.9%             | 7974       | <b>1.4%</b>      | <b>B</b>                | -        | <b>A</b> | -     | <b>N370S</b>     |
| 1            | 153,927,052        | rs10908557            | 1,278,582 | <b>AB</b>        | <b>AA</b>        |                        | 7887       | <b>2.1%</b>      | 6059       | 1.1%             | <b>B</b>                | -        | <b>A</b> | -     | <b>N370S</b>     |
| 1            | 153,932,212        | rs6724                | 1,273,422 | <b>AB</b>        | <b>AA</b>        |                        | 7911       | <b>1.4%</b>      | 5776       | 0.7%             | <b>B</b>                | -        | <b>A</b> | -     | <b>N370S</b>     |
| 1            | 153,986,637        | rs11264865            | 1,218,997 | <b>AB</b>        | <b>AA</b>        |                        | 7370       | <b>8.3%</b>      | 1819       | 0.4%             | <b>B</b>                | -        | <b>A</b> | -     | <b>N370S</b>     |
| 1            | 154,017,501        | rs2841102             | 1,188,133 | <b>AB</b>        | <b>AA</b>        |                        | 7867       | <b>2.1%</b>      | 7315       | <b>4.2%</b>      | <b>B</b>                | -        | <b>A</b> | -     | <b>N370S</b>     |
| 1            | 154,669,294        | rs386559666           | 536,340   | <b>AB</b>        | <b>BB</b>        |                        | 2946       | 99.4%            | 5467       | <b>98.5%</b>     | <b>A</b>                | <b>A</b> | <b>B</b> | -     | <b>N370S</b>     |
| 1            | 154,797,062        | rs6681725             | 408,572   | <b>AB</b>        | <b>AA</b>        |                        | 694        | 1.2%             | 890        | <b>2.0%</b>      | <b>B</b>                | -        | <b>A</b> | -     | <b>N370S</b>     |

|   |             |              |            |           |           |      |              |      |              |          |          |          |                      |              |
|---|-------------|--------------|------------|-----------|-----------|------|--------------|------|--------------|----------|----------|----------|----------------------|--------------|
| 1 | 155,205,634 | <b>N370S</b> | -          | -         | -         | -    | -            | -    | -            | -        | -        | -        | -                    | -            |
| 1 | 155,983,648 | rs17381047   | -778,014   | <b>AB</b> | <b>BB</b> | 6262 | 99.2%        | 4973 | <b>97.5%</b> | <b>A</b> | <b>A</b> | <b>B</b> | <b>A<sup>G</sup></b> | <b>N370S</b> |
| 1 | 156,011,444 | rs2297792    | -805,810   | <b>AB</b> | <b>BB</b> | 7978 | <b>97.9%</b> | 7979 | 99.5%        | <b>A</b> | <b>A</b> | <b>B</b> | <b>A<sup>G</sup></b> | <b>N370S</b> |
| 1 | 156,024,373 | rs3754293    | -818,739   | <b>AB</b> | <b>BB</b> | 3377 | 99.7%        | 1752 | <b>97.8%</b> | <b>A</b> | <b>A</b> | <b>B</b> | <b>A<sup>G</sup></b> | <b>N370S</b> |
| 1 | 156,230,936 | rs759329     | -1,025,302 | <b>AB</b> | <b>BB</b> | 7977 | 99.5%        | 7985 | <b>97.8%</b> | <b>A</b> | <b>A</b> | <b>B</b> | <b>A<sup>G</sup></b> | <b>N370S</b> |
| 1 | 156,394,000 | rs7548323    | -1,188,366 | <b>AB</b> | <b>AA</b> | 784  | <b>1.3%</b>  | 957  | 0.3%         | <b>B</b> | -        | <b>A</b> | -                    | <b>N370S</b> |
| 1 | 156,446,450 | rs12131289   | -1,240,816 | <b>AB</b> | <b>BB</b> | 549  | <b>97.3%</b> | 637  | 99.2%        | <b>A</b> | -        | <b>B</b> | -                    | <b>N370S</b> |
| 1 | 156,456,301 | rs202206511  | -1,250,667 | <b>AB</b> | <b>BB</b> | 2277 | <b>98.2%</b> | 1721 | <b>98.2%</b> | <b>A</b> | -        | <b>B</b> | -                    | <b>N370S</b> |
| 1 | 156,466,699 | rs1342442    | -1,261,065 | <b>AB</b> | <b>BB</b> | 970  | <b>96.2%</b> | 767  | 99.1%        | <b>A</b> | -        | <b>B</b> | -                    | <b>N370S</b> |
| 1 | 156,610,688 | rs386529395  | -1,405,054 | <b>AB</b> | <b>BB</b> | 1134 | <b>98.1%</b> | 1048 | 99.6%        | <b>A</b> | -        | <b>B</b> | -                    | <b>N370S</b> |
| 1 | 156,907,550 | rs3765790    | -1,701,916 | <b>AB</b> | <b>AA</b> | 7874 | <b>2.5%</b>  | 7854 | 0.4%         | <b>B</b> | -        | <b>A</b> | -                    | <b>N370S</b> |
| 1 | 156,908,986 | rs386585816  | -1,703,352 | <b>AB</b> | <b>AA</b> | 2069 | <b>1.6%</b>  | 2007 | <b>1.3%</b>  | <b>B</b> | -        | <b>A</b> | -                    | <b>N370S</b> |
| 1 | 156,933,962 | rs11806313   | -1,728,328 | <b>AB</b> | <b>AA</b> | 5269 | <b>1.4%</b>  | 5923 | <b>2.2%</b>  | <b>B</b> | -        | <b>A</b> | -                    | <b>N370S</b> |
| 1 | 156,964,467 | rs6689412    | -1,758,833 | <b>AB</b> | <b>AA</b> | 7817 | 0.6%         | 7865 | <b>1.5%</b>  | <b>B</b> | -        | <b>A</b> | -                    | <b>N370S</b> |
| 1 | 156,976,225 | rs822581     | -1,770,591 | <b>AB</b> | <b>BB</b> | 1634 | <b>97.9%</b> | 1062 | 99.4%        | <b>A</b> | -        | <b>B</b> | -                    | <b>N370S</b> |
| 1 | 156,977,905 | rs703152     | -1,772,271 | <b>AB</b> | <b>BB</b> | 7869 | <b>95.9%</b> | 7874 | 99.6%        | <b>A</b> | -        | <b>B</b> | -                    | <b>N370S</b> |
| 1 | 157,059,785 | rs2031626    | -1,854,151 | <b>AB</b> | <b>AA</b> | 620  | <b>1.5%</b>  | 883  | <b>1.4%</b>  | <b>B</b> | -        | -        | -                    | -            |
| 1 | 157,061,220 | rs6677868    | -1,855,586 | <b>AB</b> | <b>AA</b> | 7744 | 0.9%         | 7794 | <b>2.4%</b>  | <b>B</b> | -        | -        | -                    | -            |

|   |             |            |            |           |           |      |             |      |             |          |   |          |   |              |
|---|-------------|------------|------------|-----------|-----------|------|-------------|------|-------------|----------|---|----------|---|--------------|
| 1 | 157,090,136 | rs12022068 | -1,884,502 | <b>AB</b> | <b>AA</b> | 7932 | <b>2.7%</b> | 7932 | <b>1.7%</b> | <b>B</b> | - | <b>A</b> | - | <b>N370S</b> |
| 1 | 157,204,044 | rs12039209 | -1,998,410 | <b>AB</b> | <b>AA</b> | 2073 | <b>2.4%</b> | 1412 | 0.8%        | B        | - | -        | - | -            |

Abbreviations and footnotes are the same as in Supplemental Table 6 with the following footnote and abbreviation modifications:

- E. The paternal fetal haplotype (PHiF) was determined from SNP III data (as described in Supplemental Methods); the paternal N370S-linked (PFB N370S) and paternal del155-linked (PFB del155) haplotypes were determined by family-based linkage analysis; the N370S consensus haplotype (N370S cons) was derived according to Figure 2. An "-" indicates that no haplotype data was available at the given position. Bold alleles were used for diagnosis of the paternal allele in the fetus ("DPAiF").
- F. Fetal allele identity (FAI) was determined by comparing the "PHiF" haplotype to the "PFB N370S", "PFB del155", and/or "N370S cons" haplotypes
- G. Near consensus N370S haplotype as determined according to Figure 4.

**Supplemental Table 19.** Identification of the paternal allele in the family 6 fetus (large panel)

| Variant data |                    |                       |           |                  |                  |                        | plasma DNA rep |                  | plasma DNA rep |                  | Haplotypes <sup>E</sup> |          |       | FAI <sup>F</sup> |
|--------------|--------------------|-----------------------|-----------|------------------|------------------|------------------------|----------------|------------------|----------------|------------------|-------------------------|----------|-------|------------------|
| Ch           | Position<br>(hg19) | dbSNP ID <sup>A</sup> | DFM (bps) | PGT <sup>B</sup> | MGT <sup>B</sup> | FL <sup>C</sup><br>(%) | 6-1            |                  | 6-2            |                  | PHiF                    | PFB      | N370S | DPAiF            |
|              |                    |                       |           |                  |                  |                        | RD (x)         | BAF <sup>D</sup> | RD (x)         | BAF <sup>D</sup> |                         | N370S    | cons  |                  |
| 1            | 153,310,156        | rs3006444             | 1,895,478 | <b>AB</b>        | <b>BB</b>        |                        | 445            | 99.1%            | 404            | <b>97.5%</b>     | A                       | -        | -     | -                |
| 1            | 153,776,666        | rs4341393             | 1,428,968 | <b>AB</b>        | <b>BB</b>        |                        | 499            | <b>98.0%</b>     | 1287           | <b>93.4%</b>     | <b>A</b>                | <b>A</b> | -     | <b>N370S</b>     |
| 1            | 153,794,996        | rs6427298             | 1,410,638 | <b>AB</b>        | <b>BB</b>        |                        | 140            | <b>95.7%</b>     | 111            | 100.0%           | A                       | -        | -     | -                |
| 1            | 153,813,165        | rs4370789             | 1,392,469 | <b>AB</b>        | <b>BB</b>        |                        | 110            | 100.0%           | 237            | <b>98.7%</b>     | <b>A</b>                | <b>A</b> | -     | <b>N370S</b>     |
| 1            | 154,017,501        | rs2841102             | 1,188,133 | <b>AB</b>        | <b>AA</b>        |                        | 3615           | <b>2.8%</b>      | 4151           | <b>2.4%</b>      | <b>B</b>                | <b>B</b> | -     | <b>N370S</b>     |
| 1            | 154,026,642        | rs34752019            | 1,178,992 | <b>AB</b>        | <b>AA</b>        |                        | 6041           | <b>1.6%</b>      | 3044           | 1.0%             | B                       | -        | -     | -                |
| 1            | 154,556,663        | rs1127311             | 648,971   | <b>AB</b>        | <b>BB</b>        | 3.6                    | 393            | <b>98.0%</b>     | 357            | 100.0%           | <b>A</b>                | <b>A</b> | -     | <b>N370S</b>     |
| 1            | 154,589,965        | rs9426827             | 615,669   | <b>AB</b>        | <b>BB</b>        |                        | 246            | 100.0%           | 292            | <b>94.5%</b>     | <b>A</b>                | <b>A</b> | -     | <b>N370S</b>     |
| 1            | 154,609,009        | rs9427109             | 596,625   | <b>AB</b>        | <b>BB</b>        |                        | 1938           | <b>83.7%</b>     | 1062           | <b>98.1%</b>     | <b>A</b>                | <b>A</b> | -     | <b>N370S</b>     |
| 1            | 154,653,951        | rs61811421            | 551,683   | <b>AB</b>        | <b>AA</b>        |                        | 555            | 0.2%             | 827            | <b>1.5%</b>      | B                       | -        | -     | -                |
| 1            | 154,677,716        | rs56320421            | 527,918   | <b>AB</b>        | <b>AA</b>        |                        | 7922           | <b>8.7%</b>      | 7881           | 0.4%             | B                       | -        | -     | -                |
| 1            | 154,774,966        | rs6690891             | 430,668   | <b>AB</b>        | <b>AA</b>        |                        | 2549           | <b>2.0%</b>      | 3724           | 1.4%             | <b>B</b>                | <b>B</b> | -     | <b>N370S</b>     |
| 1            | 155,030,557        | rs11264303            | 175,077   | <b>AB</b>        | <b>BB</b>        |                        | 1891           | <b>96.4%</b>     | 871            | 99.3%            | <b>A</b>                | <b>A</b> | -     | <b>N370S</b>     |

|   |             |              |            |           |           |      |              |      |              |          |          |                      |              |
|---|-------------|--------------|------------|-----------|-----------|------|--------------|------|--------------|----------|----------|----------------------|--------------|
| 1 | 155,205,634 | <b>N370S</b> | -          | -         | -         | -    | -            | -    | -            | -        | -        | -                    | -            |
| 1 | 155,213,124 | rs11264345   | -7,490     | <b>AB</b> | <b>BB</b> | 7672 | <b>97.8%</b> | 7692 | 99.4%        | <b>A</b> | <b>A</b> | <b>A</b>             | <b>N370S</b> |
| 1 | 155,230,131 | rs386580544  | -24,497    | <b>AB</b> | <b>BB</b> | 4312 | <b>96.4%</b> | 7656 | <b>97.4%</b> | <b>A</b> | <b>A</b> | <b>A</b>             | <b>N370S</b> |
| 1 | 155,473,356 | rs1360554    | -267,722   | <b>AB</b> | <b>AA</b> | 874  | <b>6.5%</b>  | 2205 | 1.0%         | <b>B</b> | <b>B</b> | <b>B</b>             | <b>N370S</b> |
| 1 | 155,893,750 | rs506688     | -688,116   | <b>AB</b> | <b>BB</b> | 335  | 100.0%       | 424  | <b>98.3%</b> | <b>A</b> | <b>A</b> | <b>A<sup>G</sup></b> | <b>N370S</b> |
| 1 | 156,106,863 | rs553016     | -901,229   | <b>AB</b> | <b>AA</b> | 140  | <b>5.0%</b>  | 159  | 1.3%         | <b>B</b> | -        | <b>B<sup>G</sup></b> | <b>N370S</b> |
| 1 | 156,502,991 | rs1609666    | -1,297,357 | <b>AB</b> | <b>BB</b> | 1928 | <b>98.2%</b> | 1567 | <b>95.3%</b> | <b>A</b> | <b>A</b> | -                    | <b>N370S</b> |
| 1 | 156,532,733 | rs4661183    | -1,327,099 | <b>AB</b> | <b>AA</b> | 7731 | <b>3.5%</b>  | 7645 | 0.8%         | <b>B</b> | <b>B</b> | -                    | <b>N370S</b> |
| 1 | 156,588,749 | rs2365714    | -1,383,115 | <b>AB</b> | <b>BB</b> | 3951 | <b>70.6%</b> | 2353 | <b>98.2%</b> | <b>A</b> | <b>A</b> | -                    | <b>N370S</b> |
| 1 | 156,589,450 | rs3795727    | -1,383,816 | <b>AB</b> | <b>BB</b> | 336  | <b>95.2%</b> | 276  | 99.3%        | <b>A</b> | <b>A</b> | -                    | <b>N370S</b> |
| 1 | 156,711,623 | rs3806417    | -1,505,989 | <b>AB</b> | <b>AA</b> | 532  | <b>36.8%</b> | 1020 | 0.2%         | <b>B</b> | -        | -                    | -            |
| 1 | 156,814,027 | rs56252149   | -1,608,393 | <b>AB</b> | <b>AA</b> | 482  | 1.0%         | 323  | <b>19.2%</b> | <b>B</b> | -        | -                    | -            |
| 1 | 157,043,969 | rs16865471   | -1,838,335 | <b>AB</b> | <b>AA</b> | 262  | <b>2.3%</b>  | 1129 | 1.3%         | <b>B</b> | -        | -                    | -            |
| 1 | 157,194,059 | rs10494311   | -1,988,425 | <b>AB</b> | <b>BB</b> | 855  | <b>95.3%</b> | 816  | 99.3%        | <b>A</b> | <b>A</b> | -                    | <b>N370S</b> |

Abbreviations and footnotes are the same as in Supplemental Table 6 with the following additional footnote:

G. Near consensus N370S haplotype as determined according to Figure 4.

**Supplemental Table 20.** Identification of the maternal allele in the family 7 fetus (large panel)

| Variant data |                    |                       |           |                  |                  |                        | plasma DNA |                  | plasma DNA |                  | Haplotypes <sup>E</sup> |          |          |       | FAI <sup>F</sup> |
|--------------|--------------------|-----------------------|-----------|------------------|------------------|------------------------|------------|------------------|------------|------------------|-------------------------|----------|----------|-------|------------------|
| Ch           | Position<br>(hg19) | dbSNP ID <sup>A</sup> | DFM (bps) | PGT <sup>B</sup> | MGT <sup>B</sup> | FL <sup>C</sup><br>(%) | rep 7-1    |                  | rep 7-2    |                  | MHIF                    | MFB      | MFB      | N370S | DMAiF            |
|              |                    |                       |           |                  |                  |                        | RD (x)     | BAF <sup>D</sup> | RD (x)     | BAF <sup>D</sup> |                         | N370S    | L444P    | cons  |                  |
| 1            | 153,217,977        | rs1926234             | 1,987,657 | <b>BB</b>        | <b>AB</b>        |                        | 29461      | 67.3%            | 29390      | 74.6%            | <b>B</b>                | <b>A</b> | <b>B</b> | -     | <b>L444P</b>     |
| 1            | 153,335,384        | rs386537988           | 1,870,250 | <b>AA</b>        | <b>AB</b>        |                        | 6853       | 18.8%            | 8928       | 21.4%            | A                       | -        | -        | -     | -                |
| 1            | 153,526,349        | rs55955983            | 1,679,285 | <b>AA</b>        | <b>AB</b>        |                        | 12549      | 32.5%            | 33520      | 33.4%            | <b>A</b>                | -        | <b>A</b> | -     | <b>L444P</b>     |
| 1            | 153,776,666        | rs4341393             | 1,428,968 | <b>AA</b>        | <b>AB</b>        |                        | 9602       | 27.8%            | 11192      | 43.6%            | A                       | -        | -        | -     | -                |
| 1            | 153,777,848        | rs1139620             | 1,427,786 | <b>AA</b>        | <b>AB</b>        |                        | 1767       | 26.3%            | 641        | 16.2%            | A                       | -        | -        | -     | -                |
| 1            | 153,779,412        | rs1127091             | 1,426,222 | <b>AA</b>        | <b>AB</b>        |                        | 15005      | 29.0%            | 9780       | 32.6%            | A                       | -        | -        | -     | -                |
| 1            | 153,825,208        | rs4540690             | 1,380,426 | <b>AA</b>        | <b>AB</b>        | 23.2                   | 8827       | 44.8%            | 8411       | 36.7%            | A                       | -        | -        | -     | -                |
| 1            | 153,854,161        | rs12039936            | 1,351,473 | <b>AA</b>        | <b>AB</b>        |                        | 538        | 30.7%            | 763        | 30.3%            | <b>A</b>                | -        | <b>A</b> | -     | <b>L444P</b>     |
| 1            | 153,893,023        | rs10494303            | 1,312,611 | <b>BB</b>        | <b>AB</b>        |                        | 8757       | 54.7%            | 7414       | 54.6%            | B                       | -        | -        | -     | -                |
| 1            | 154,167,788        | rs4364874             | 1,037,846 | <b>BB</b>        | <b>AB</b>        |                        | 10931      | 70.1%            | 12874      | 56.2%            | B                       | -        | -        | -     | -                |
| 1            | 154,192,143        | rs9803862             | 1,013,491 | <b>BB</b>        | <b>AB</b>        |                        | 2507       | 69.2%            | 2222       | 53.1%            | B                       | -        | -        | -     | -                |
| 1            | 154,741,579        | rs7547552             | 464,055   | <b>AA</b>        | <b>AB</b>        |                        | 7330       | 38.0%            | 8184       | 24.6%            | A                       | -        | -        | -     | -                |
| 1            | 154,774,966        | rs6690891             | 430,668   | <b>AA</b>        | <b>AB</b>        |                        | 4793       | 27.3%            | 4395       | 30.8%            | <b>A</b>                | -        | <b>A</b> | -     | <b>L444P</b>     |

|   |             |              |            |           |           |       |       |       |       |          |          |          |   |              |
|---|-------------|--------------|------------|-----------|-----------|-------|-------|-------|-------|----------|----------|----------|---|--------------|
| 1 | 154,803,645 | rs386523166  | 401,989    | <b>BB</b> | <b>AB</b> | 8516  | 55.2% | 6881  | 57.4% | <b>B</b> | -        | <b>B</b> | - | <b>L444P</b> |
| 1 | 154,810,548 | rs34647098   | 395,086    | <b>AA</b> | <b>AB</b> | 15074 | 38.9% | 14238 | 39.4% | <b>A</b> | -        | <b>A</b> | - | <b>L444P</b> |
| 1 | 154,828,683 | rs56382016   | 376,951    | <b>AA</b> | <b>AB</b> | 1421  | 18.2% | 2680  | 28.1% | <b>A</b> | -        | <b>A</b> | - | <b>L444P</b> |
| 1 | 155,205,634 | <b>N370S</b> | -          | -         | -         | -     | -     | -     | -     | -        | -        | -        | - | -            |
| 1 | 156,351,699 | rs3748569    | -1,146,065 | <b>AA</b> | <b>AB</b> | 1450  | 40.1% | 2048  | 34.9% | <b>A</b> | -        | <b>A</b> | - | <b>L444P</b> |
| 1 | 156,351,792 | rs386585381  | -1,146,158 | <b>AA</b> | <b>AB</b> | 2749  | 37.5% | 3902  | 33.1% | <b>A</b> | -        | <b>A</b> | - | <b>L444P</b> |
| 1 | 156,718,448 | rs11264533   | -1,512,814 | <b>AA</b> | <b>AB</b> | 10379 | 30.0% | 9858  | 29.8% | <b>A</b> | -        | -        | - | -            |
| 1 | 156,738,464 | rs76807267   | -1,532,830 | <b>AA</b> | <b>AB</b> | 1617  | 25.4% | 3266  | 38.3% | <b>A</b> | -        | <b>A</b> | - | <b>L444P</b> |
| 1 | 156,774,672 | rs2644609    | -1,569,038 | <b>AA</b> | <b>AB</b> | 1634  | 35.6% | 2430  | 33.3% | <b>A</b> | <b>B</b> | <b>A</b> | - | <b>L444P</b> |
| 1 | 156,805,803 | rs7534418    | -1,600,169 | <b>BB</b> | <b>AB</b> | 185   | 79.5% | 368   | 98.9% | <b>B</b> | <b>A</b> | <b>B</b> | - | <b>L444P</b> |
| 1 | 156,855,854 | rs61813800   | -1,650,220 | <b>AA</b> | <b>AB</b> | 654   | 16.2% | 1804  | 12.6% | <b>A</b> | -        | <b>A</b> | - | <b>L444P</b> |
| 1 | 156,934,893 | rs4661077    | -1,729,259 | <b>AA</b> | <b>AB</b> | 2413  | 29.8% | 1735  | 35.3% | <b>A</b> | <b>B</b> | <b>A</b> | - | <b>L444P</b> |

Abbreviations and footnotes are the same as in Supplemental Table 13 with the following footnote and abbreviation modifications:

- E. The maternal fetal haplotype (MHiF) was determined from SNP III data (as described in Supplemental Methods); the maternal N370S-linked (MFB N370S) and maternal L444P-linked (MFB L444P) haplotypes were determined by family-based linkage analysis; the N370S consensus haplotype (N370S cons) was derived according to Figure 2. An "-" indicates that no haplotype data was available at the given position. Bold alleles were used for diagnosis of the maternal allele in the fetus ("DMAiF").
- F. Fetal allele identity (FAI) was determined by comparing the "MHiF" haplotype to the "MFB N370S", "MFB L444P", and/or "N370S cons" haplotypes



**Supplemental Table 21.** Identification of the maternal allele in the family 8 fetus (large panel)

| Variant data |                    |                       |           |                  |                  |                        | plasma DNA |                  | plasma DNA |                  | Haplotypes <sup>E</sup> |       |      |       | FAI <sup>F</sup> |
|--------------|--------------------|-----------------------|-----------|------------------|------------------|------------------------|------------|------------------|------------|------------------|-------------------------|-------|------|-------|------------------|
| Ch           | Position<br>(hg19) | dbSNP ID <sup>A</sup> | DFM (bps) | PGT <sup>B</sup> | MGT <sup>B</sup> | FL <sup>C</sup><br>(%) | rep 8-1    |                  | rep 8-2    |                  | MHIF                    | MFB   | MFB  | N370S | DMAiF            |
|              |                    |                       |           |                  |                  |                        | RD (x)     | BAF <sup>D</sup> | RD<br>(x)  | BAF <sup>D</sup> |                         | N370S | 84GG | cons  |                  |
| 1            | 153,283,978        | rs821420              | 1,921,656 | BB               | AB               |                        | 4411       | 62.3%            | 2660       | 52.0%            | B                       | A     | -    | -     | 84GG             |
| 1            | 153,284,423        | rs821418              | 1,921,211 | BB               | AB               |                        | 1917       | 84.0%            | 1176       | 73.0%            | B                       | A     | -    | -     | 84GG             |
| 1            | 153,302,417        | rs2771120             | 1,903,217 | BB               | AB               |                        | 820        | 78.3%            | 1131       | 88.8%            | B                       | A     | -    | -     | 84GG             |
| 1            | 153,327,732        | rs2916198             | 1,877,902 | AA               | AB               |                        | 694        | 20.3%            | 209        | 24.9%            | A                       | -     | A    | -     | 84GG             |
| 1            | 153,609,039        | rs4845557             | 1,596,595 | AA               | AB               |                        | 538        | 5.2%             | 864        | 25.3%            | A                       | -     | -    | -     | -                |
| 1            | 153,613,545        | rs12564925            | 1,592,089 | AA               | AB               |                        | 802        | 3.9%             | 1323       | 13.2%            | A                       | -     | -    | -     | -                |
| 1            | 153,616,857        | rs3790412             | 1,588,777 | AA               | AB               | 2.8                    | 7859       | 40.8%            | 3529       | 24.0%            | A                       | -     | -    | -     | -                |
| 1            | 153,753,079        | rs12030242            | 1,452,555 | AA               | AB               |                        | 7847       | 5.8%             | 7707       | 35.9%            | A                       |       | A    | -     | 84GG             |
| 1            | 154,238,383        | rs1194596             | 967,251   | AA               | AB               |                        | 3814       | 31.2%            | 3757       | 21.1%            | A                       | B     | A    | -     | 84GG             |
| 1            | 154,259,275        | rs1760802             | 946,359   | AA               | AB               |                        | 942        | 5.5%             | 2605       | 2.2%             | A                       | B     | A    | -     | 84GG             |
| 1            | 154,381,103        | rs12083537            | 824,531   | AA               | AB               |                        | 1506       | 41.4%            | 798        | 28.3%            | A                       |       | -    | -     | -                |
| 1            | 154,692,088        | rs4845663             | 513,546   | BB               | AB               |                        | 7861       | 69.5%            | 7876       | 56.7%            | B                       | A     | -    | -     | 84GG             |
| 1            | 154,731,151        | rs2131900             | 474,483   | AA               | AB               |                        | 7146       | 12.9%            | 5791       | 36.9%            | A                       | B     | -    | -     | 84GG             |

|   |             |              |            |           |           |      |       |      |       |          |          |          |                      |             |
|---|-------------|--------------|------------|-----------|-----------|------|-------|------|-------|----------|----------|----------|----------------------|-------------|
| 1 | 154,737,423 | rs1506983    | 468,211    | <b>AA</b> | <b>AB</b> | 912  | 29.1% | 1091 | 7.5%  | <b>A</b> | <b>B</b> | -        | -                    | <b>84GG</b> |
| 1 | 154,741,357 | rs56033137   | 464,277    | <b>AA</b> | <b>AB</b> | 145  | 40.7% | 268  | 20.5% | <b>A</b> | <b>B</b> | -        | -                    | <b>84GG</b> |
| 1 | 154,811,677 | rs1218574    | 393,957    | <b>BB</b> | <b>AB</b> | 1887 | 82.6% | 2373 | 61.9% | <b>B</b> | -        | <b>B</b> | -                    | <b>84GG</b> |
| 1 | 155,205,634 | <b>N370S</b> | -          | -         | -         | -    | -     | -    | -     | -        | -        | -        | -                    | -           |
| 1 | 155,870,416 | rs1749409    | -664,782   | <b>BB</b> | <b>AB</b> | 1072 | 63.0% | 1392 | 66.6% | <b>B</b> | -        | <b>B</b> | <b>A<sup>G</sup></b> | <b>84GG</b> |
| 1 | 155,899,020 | rs539602     | -693,386   | <b>BB</b> | <b>AB</b> | 406  | 51.5% | 783  | 57.1% | <b>B</b> | -        | <b>B</b> | <b>A<sup>G</sup></b> | <b>84GG</b> |
| 1 | 155,907,823 | rs11264422   | -702,189   | <b>BB</b> | <b>AB</b> | 4830 | 57.8% | 7898 | 56.7% | <b>B</b> | -        | <b>B</b> | <b>A<sup>G</sup></b> | <b>84GG</b> |
| 1 | 156,045,662 | rs10047112   | -840,028   | <b>BB</b> | <b>AB</b> | 333  | 62.8% | 321  | 75.4% | <b>B</b> | <b>A</b> | -        | <b>A<sup>G</sup></b> | <b>84GG</b> |
| 1 | 156,089,920 | rs610918     | -884,286   | <b>AA</b> | <b>AB</b> | 7797 | 24.0% | 6685 | 7.4%  | <b>A</b> | -        | <b>A</b> | <b>B<sup>G</sup></b> | <b>84GG</b> |
| 1 | 156,099,669 | rs513043     | -894,035   | <b>AA</b> | <b>AB</b> | 1225 | 14.7% | 231  | 13.4% | <b>A</b> | -        | <b>A</b> | <b>B<sup>G</sup></b> | <b>84GG</b> |
| 1 | 156,337,134 | rs3806410    | -1,131,500 | <b>AA</b> | <b>AB</b> | 5764 | 16.9% | 2573 | 25.0% | <b>A</b> | -        | <b>A</b> | -                    | <b>84GG</b> |
| 1 | 156,645,948 | rs77658164   | -1,440,314 | <b>AA</b> | <b>AB</b> | 943  | 47.8% | 240  | 33.8% | <b>A</b> | -        | -        | -                    | -           |
| 1 | 156,976,393 | rs863717     | -1,770,759 | <b>AA</b> | <b>AB</b> | 4232 | 19.0% | 2548 | 32.5% | <b>A</b> | -        | -        | -                    | -           |

Abbreviations and footnotes are the same as in Supplemental Table 13 with the following footnote and abbreviation modifications:

- E. The maternal fetal haplotype (MHiF) was determined from SNP III data (as described in Supplemental Methods); the maternal N370S-linked (MFB N370S) and maternal 84GG-linked (MFB 84GG) haplotypes were determined by family-based linkage analysis; the N370S consensus haplotype (N370S cons) was derived according to Figure 2. An "-" indicates that no haplotype data was available at the given position. Bold alleles were used for diagnosis of the maternal allele in the fetus ("DMAiF").
- F. Fetal allele identity (FAI) was determined by comparing the "MHiF" haplotype to the "MFB N370S", "MFB 84GG", and/or "N370S cons" haplotypes
